# Supplementary material for: Association between alcoholic interventions and abstinence rates for alcohol use disorders: A meta-analysis
Source: PubMed Central journal article supplement (PMC6320082; doi:10.1097/md.0000000000013566), 2018-12-14
Supplement: medi-97-e13566-s001.pdf [file medi-97-e13566-s001.pdf]

**Figure S1.** Quality assessment of (A) overall and (B) study-level risk of bias, using Cochrane’s risk of bias assessment tool, indicating quality with high ratings, unclear or low risk of bias, according to 6 evaluation criteria for each study, as presented in detail.

**Figure S1A.**

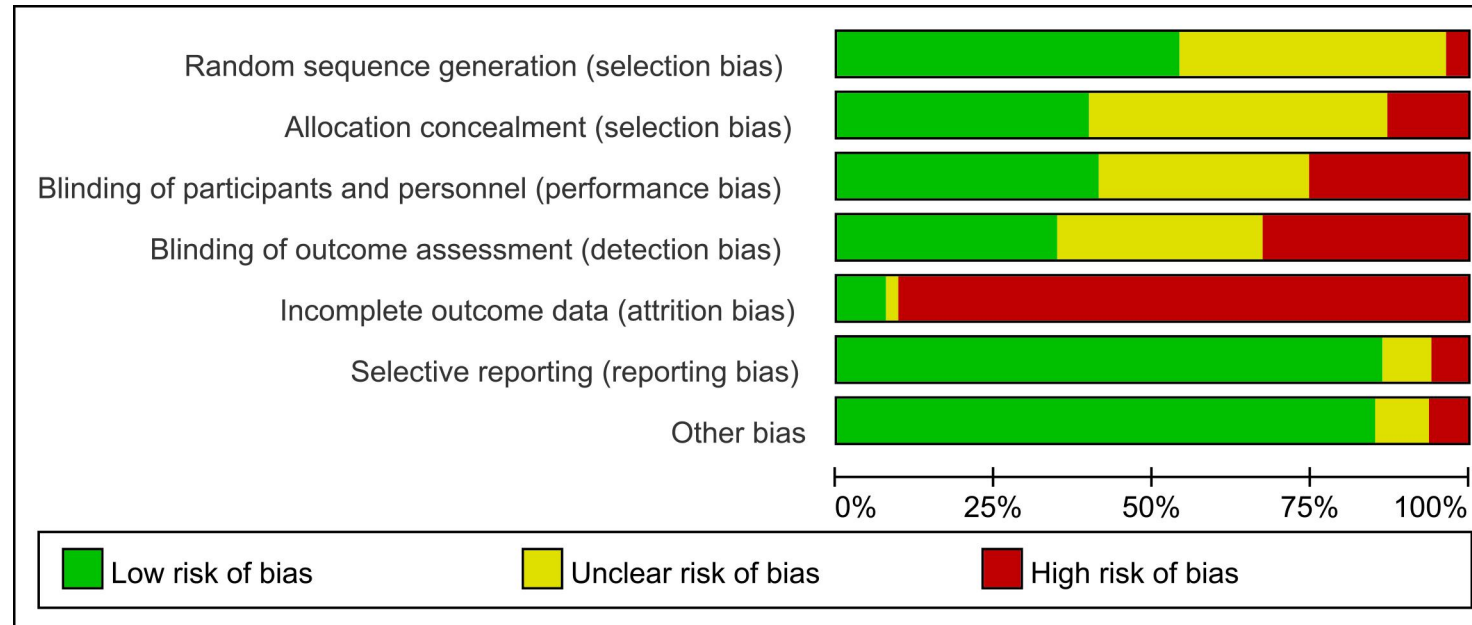

Figure S1B.

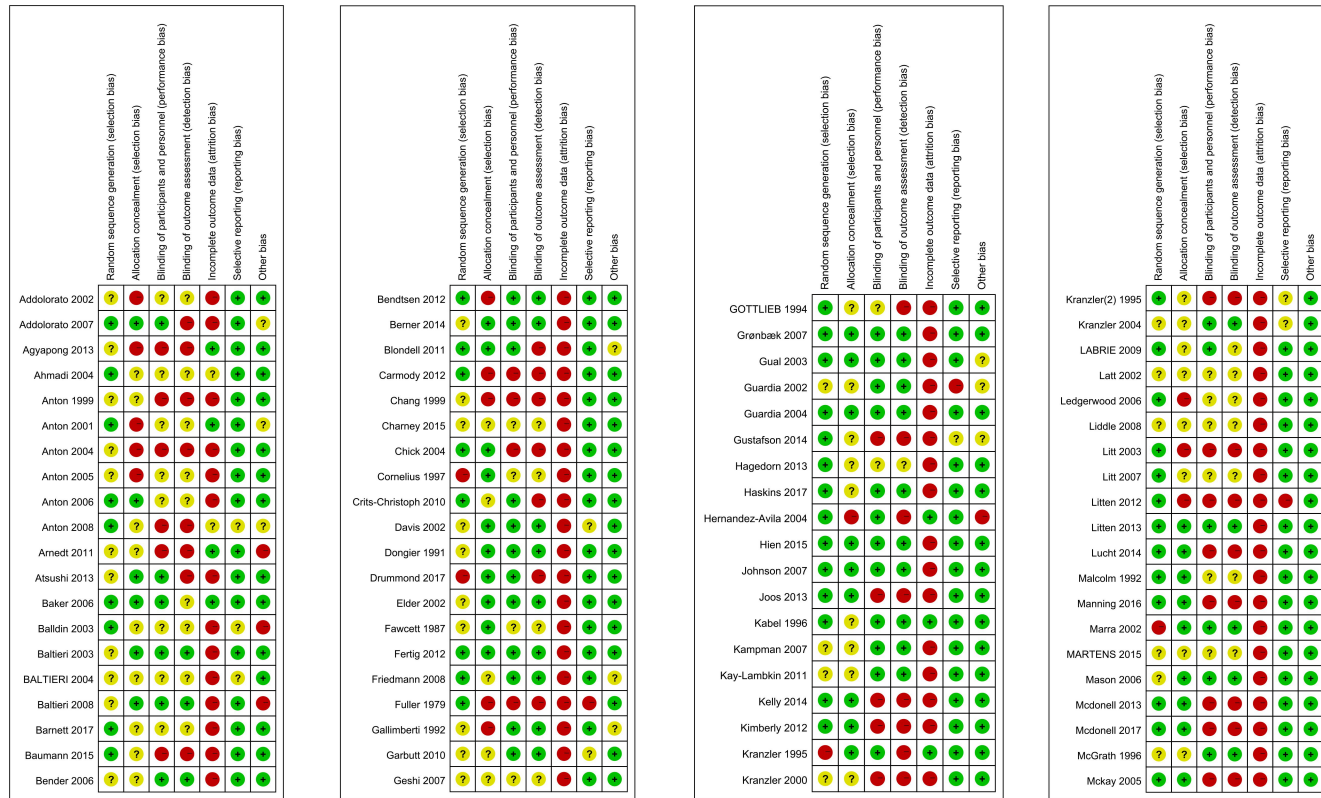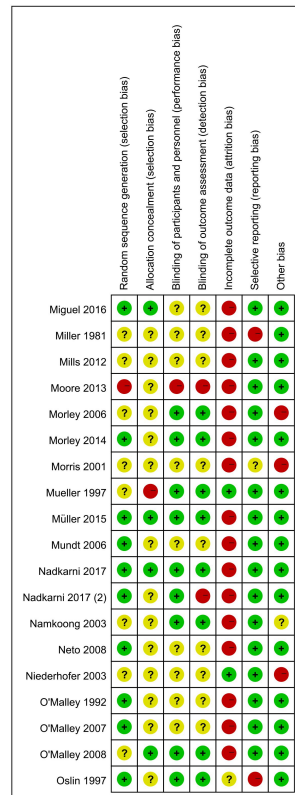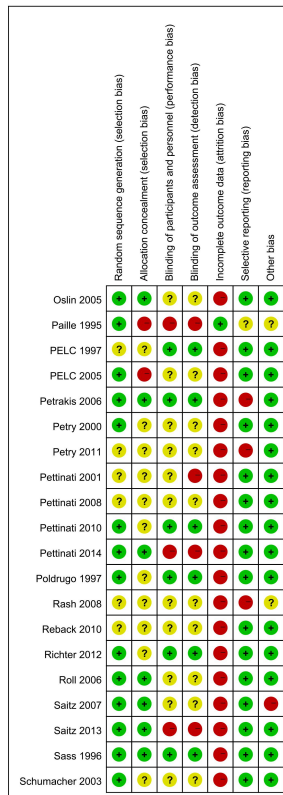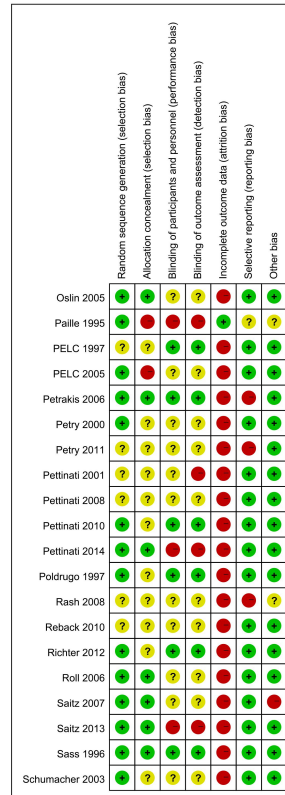

**Figure S2.** Network connections of included studies with the available direct comparisons for abstinence rates regarding (A) treatment sessions and (B) follow-up sessions. The details of sample size and trial numbers were presented.

**Figure S2A.**

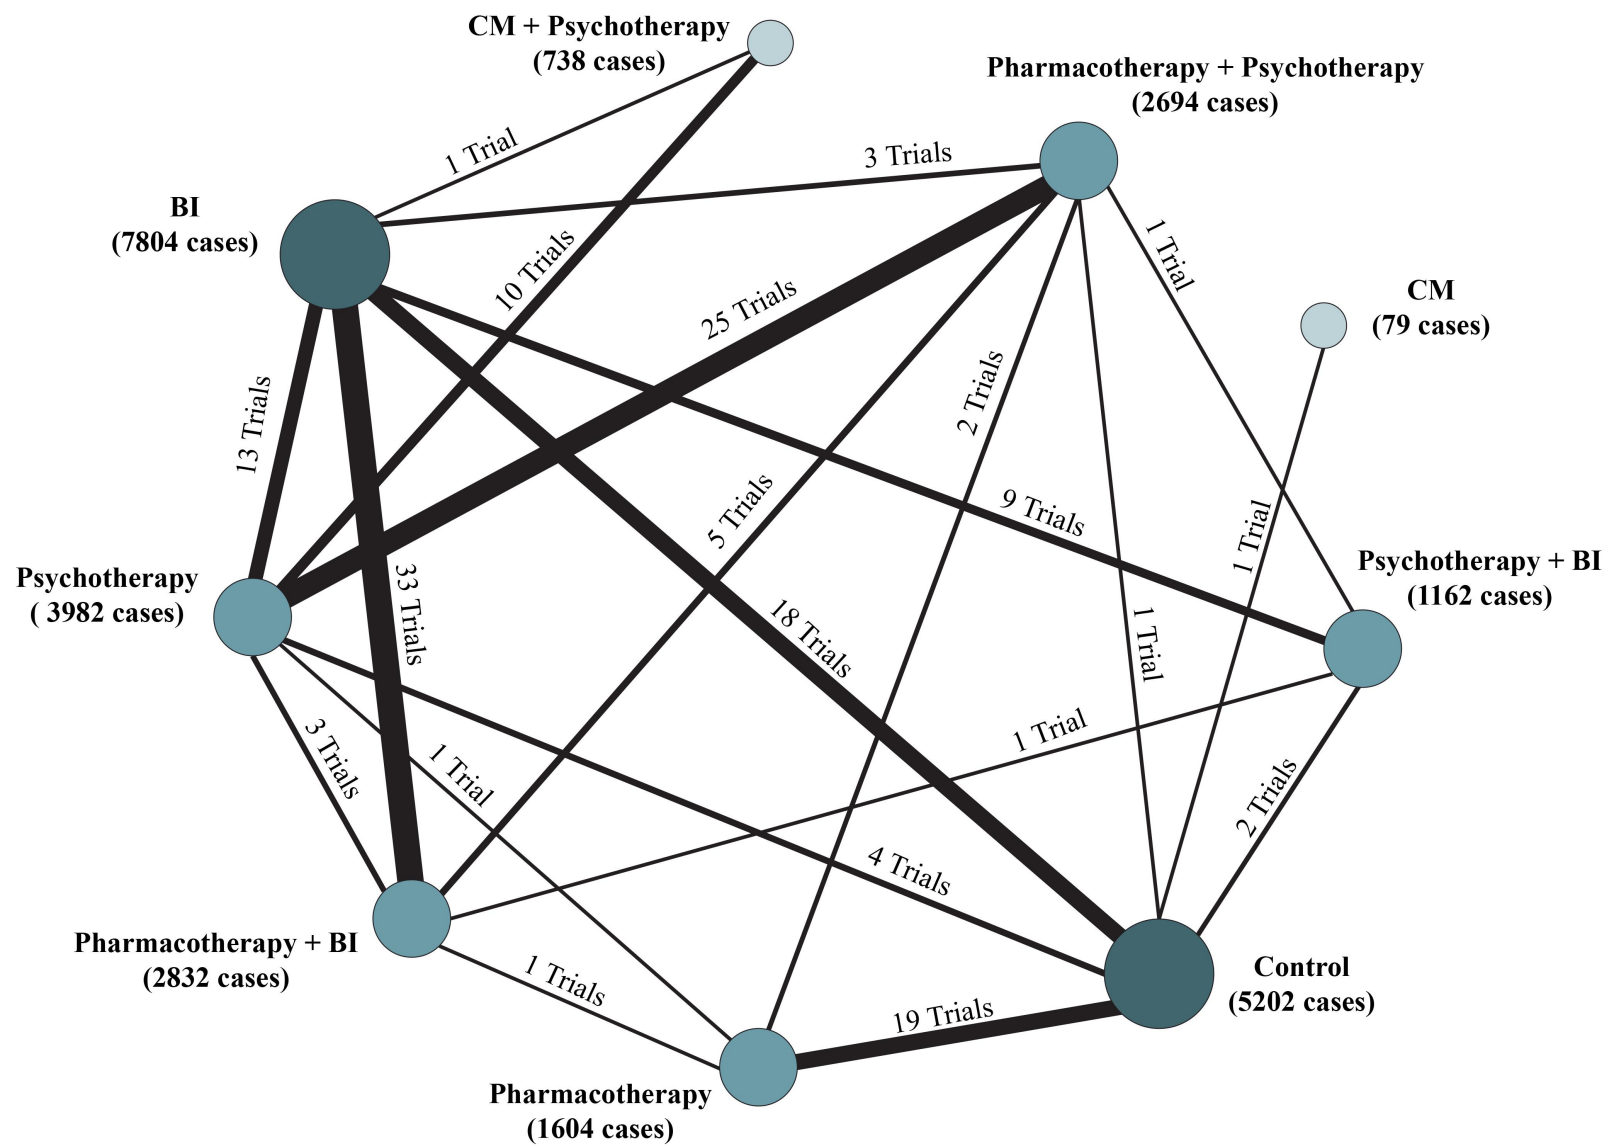


---

**The size of circles and width of lines respectively represent the number of included sample sizes and trails.**

- $\geq 5000$  cases
- $\geq 1000$  and  $< 5000$  cases
- $< 1000$  cases

**CM, contingency management; BI, Brief Intervention.**

---

Figure S2B.

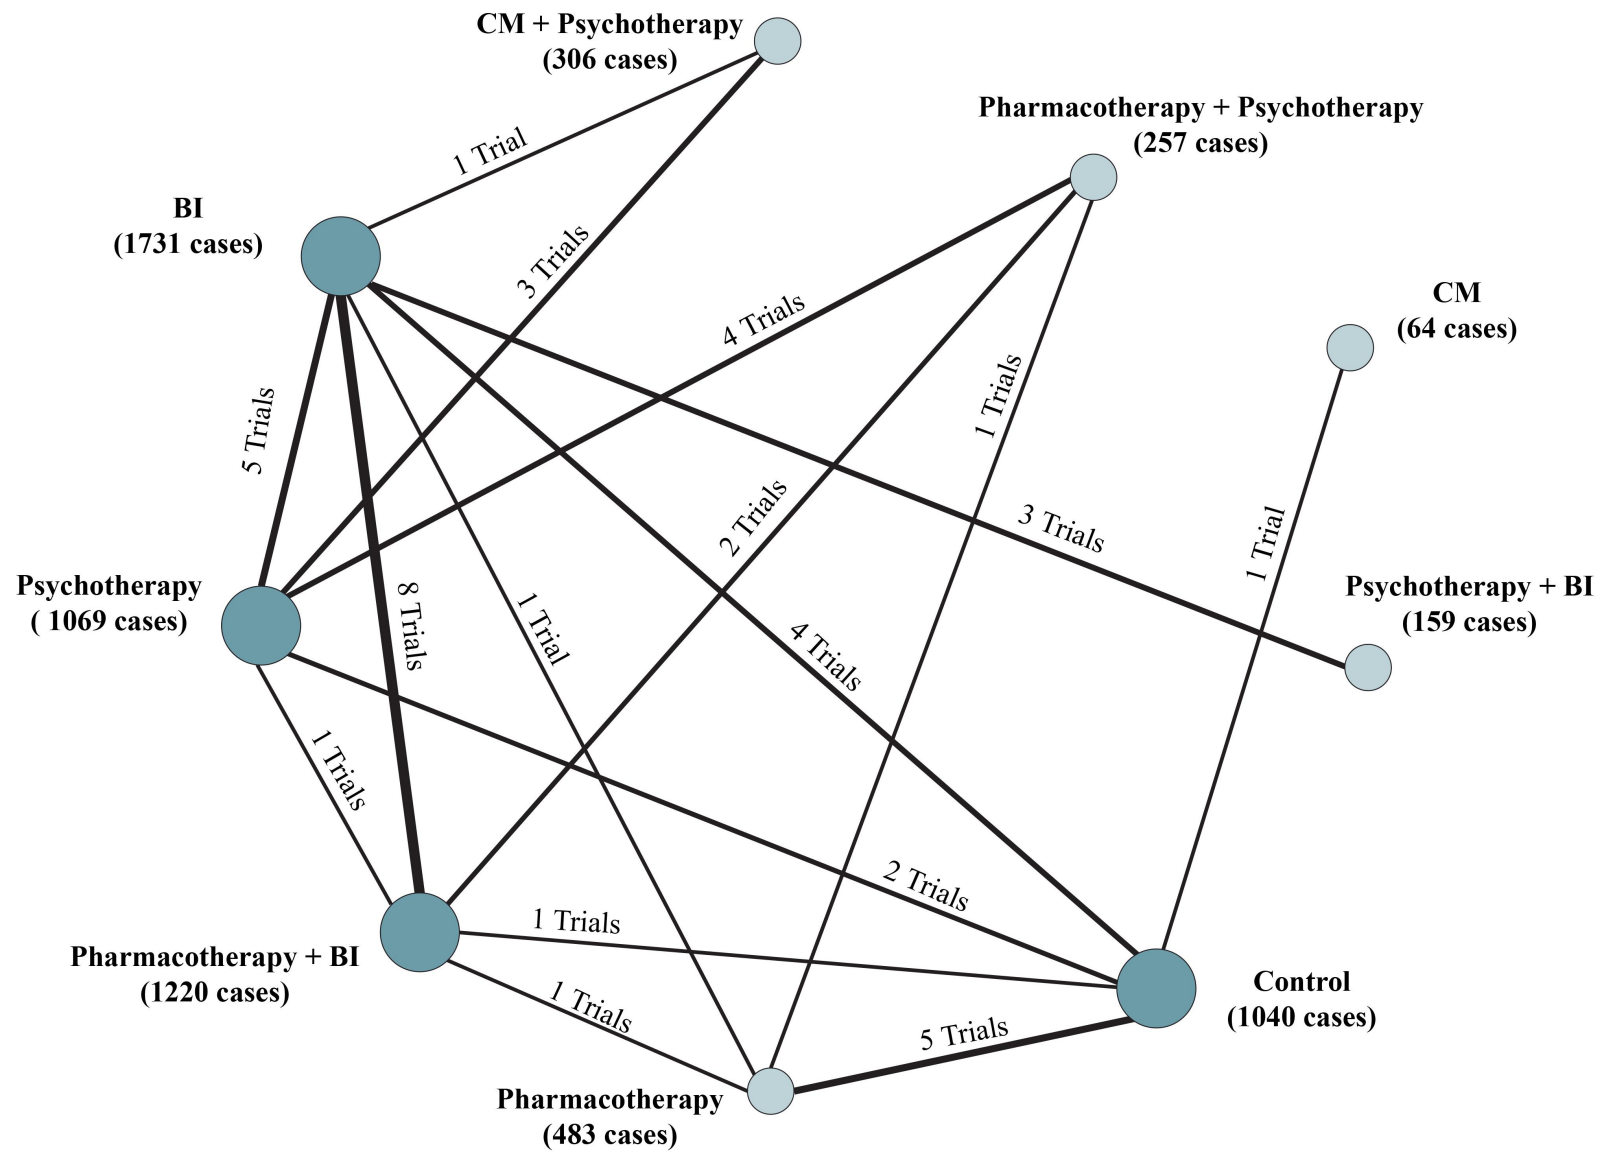

The size of circles and width of lines respectively represent the number of included sample sizes and trials. CM, contingency management; BI, Brief Intervention.

● ≥ 1000 and < 5000 cases  
● < 1000 cases

**Figure S3.** Direct meta-analysis of interventions versus control regarding the abstinence rates of (A) treatment sessions and (B) follow-up sessions. The details were consistently exhibited in Table S6.

**Figure S3A.**

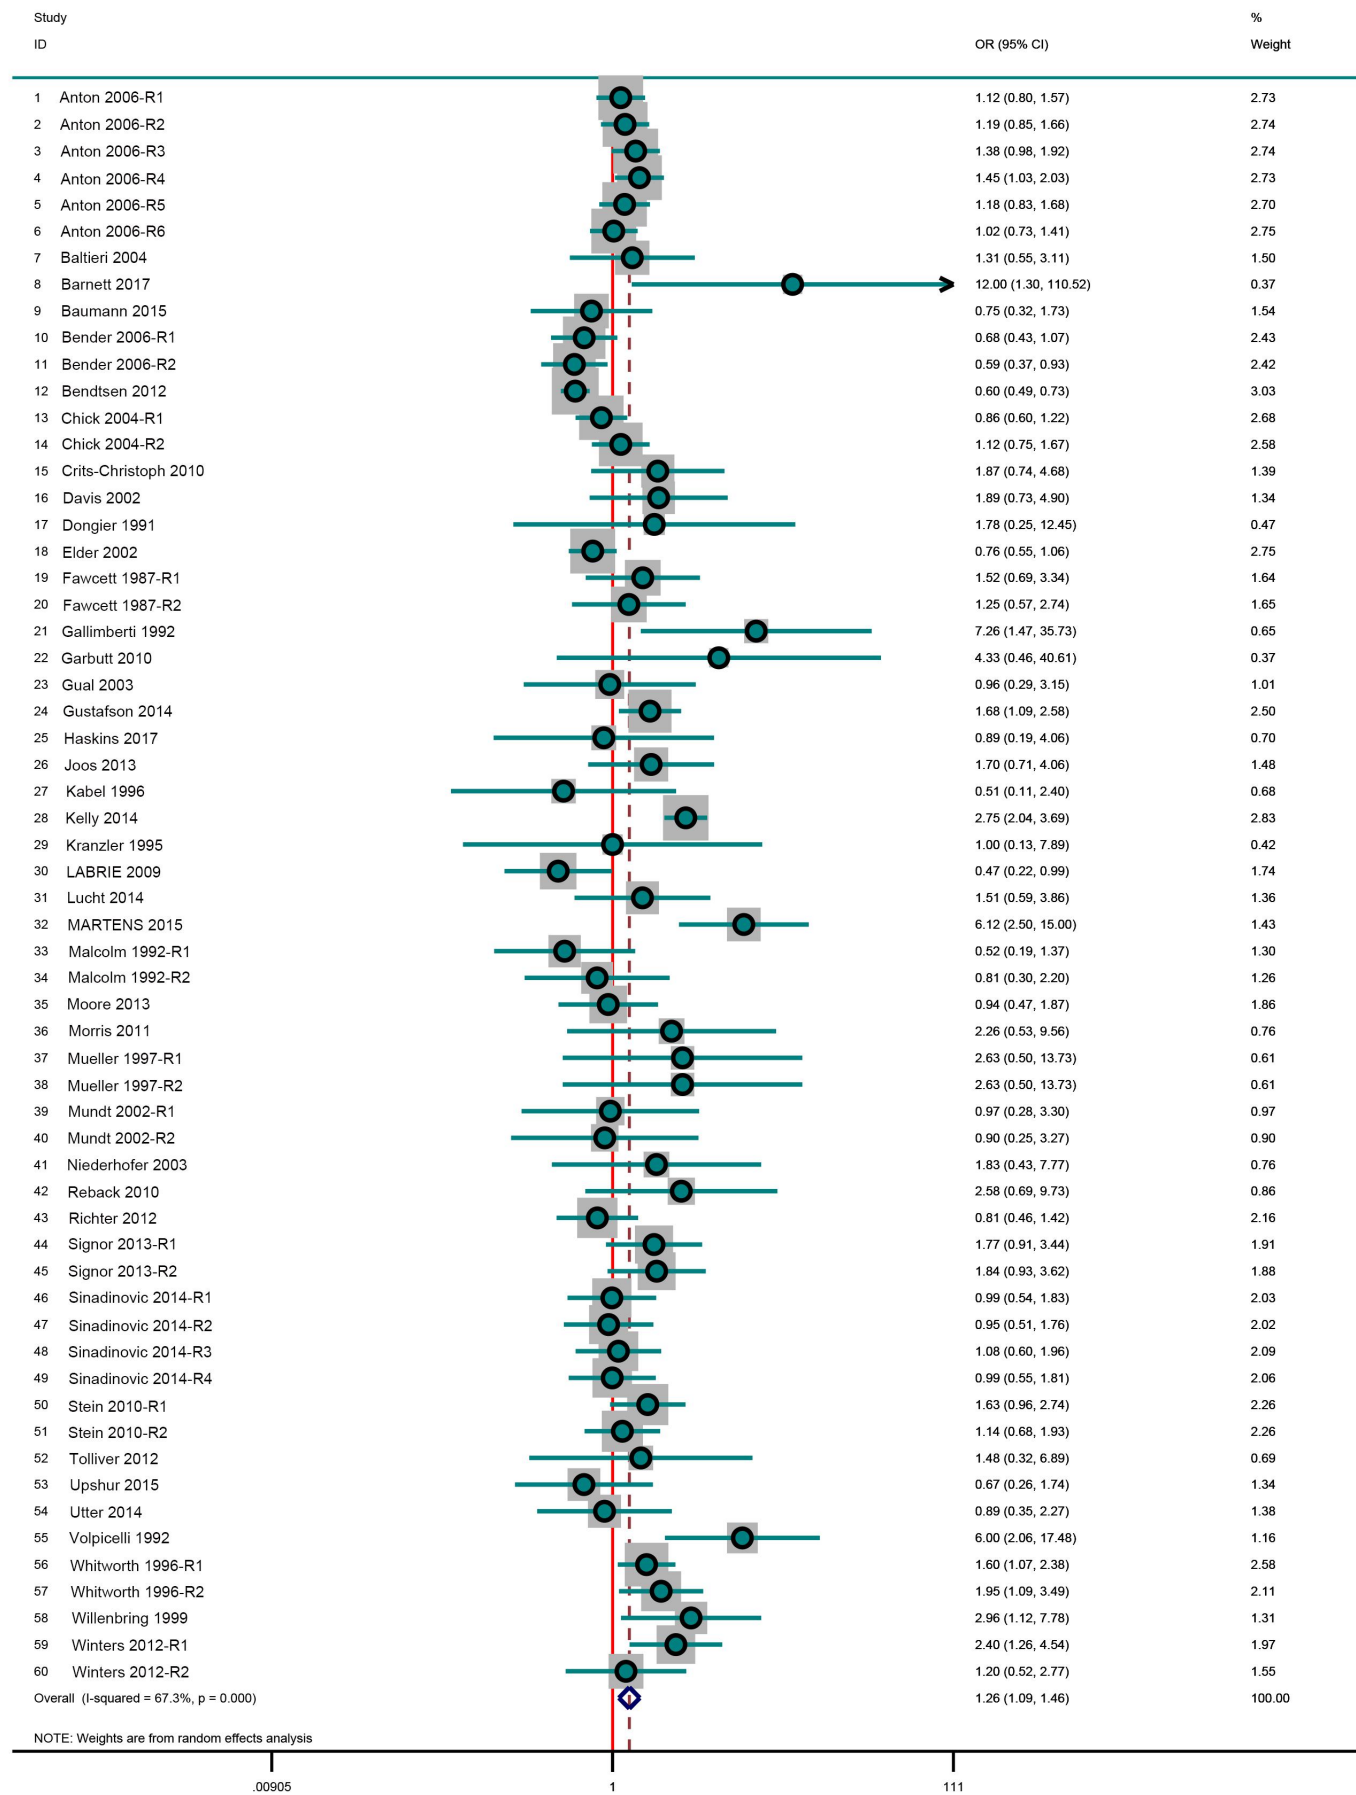

**Figure S3B.**

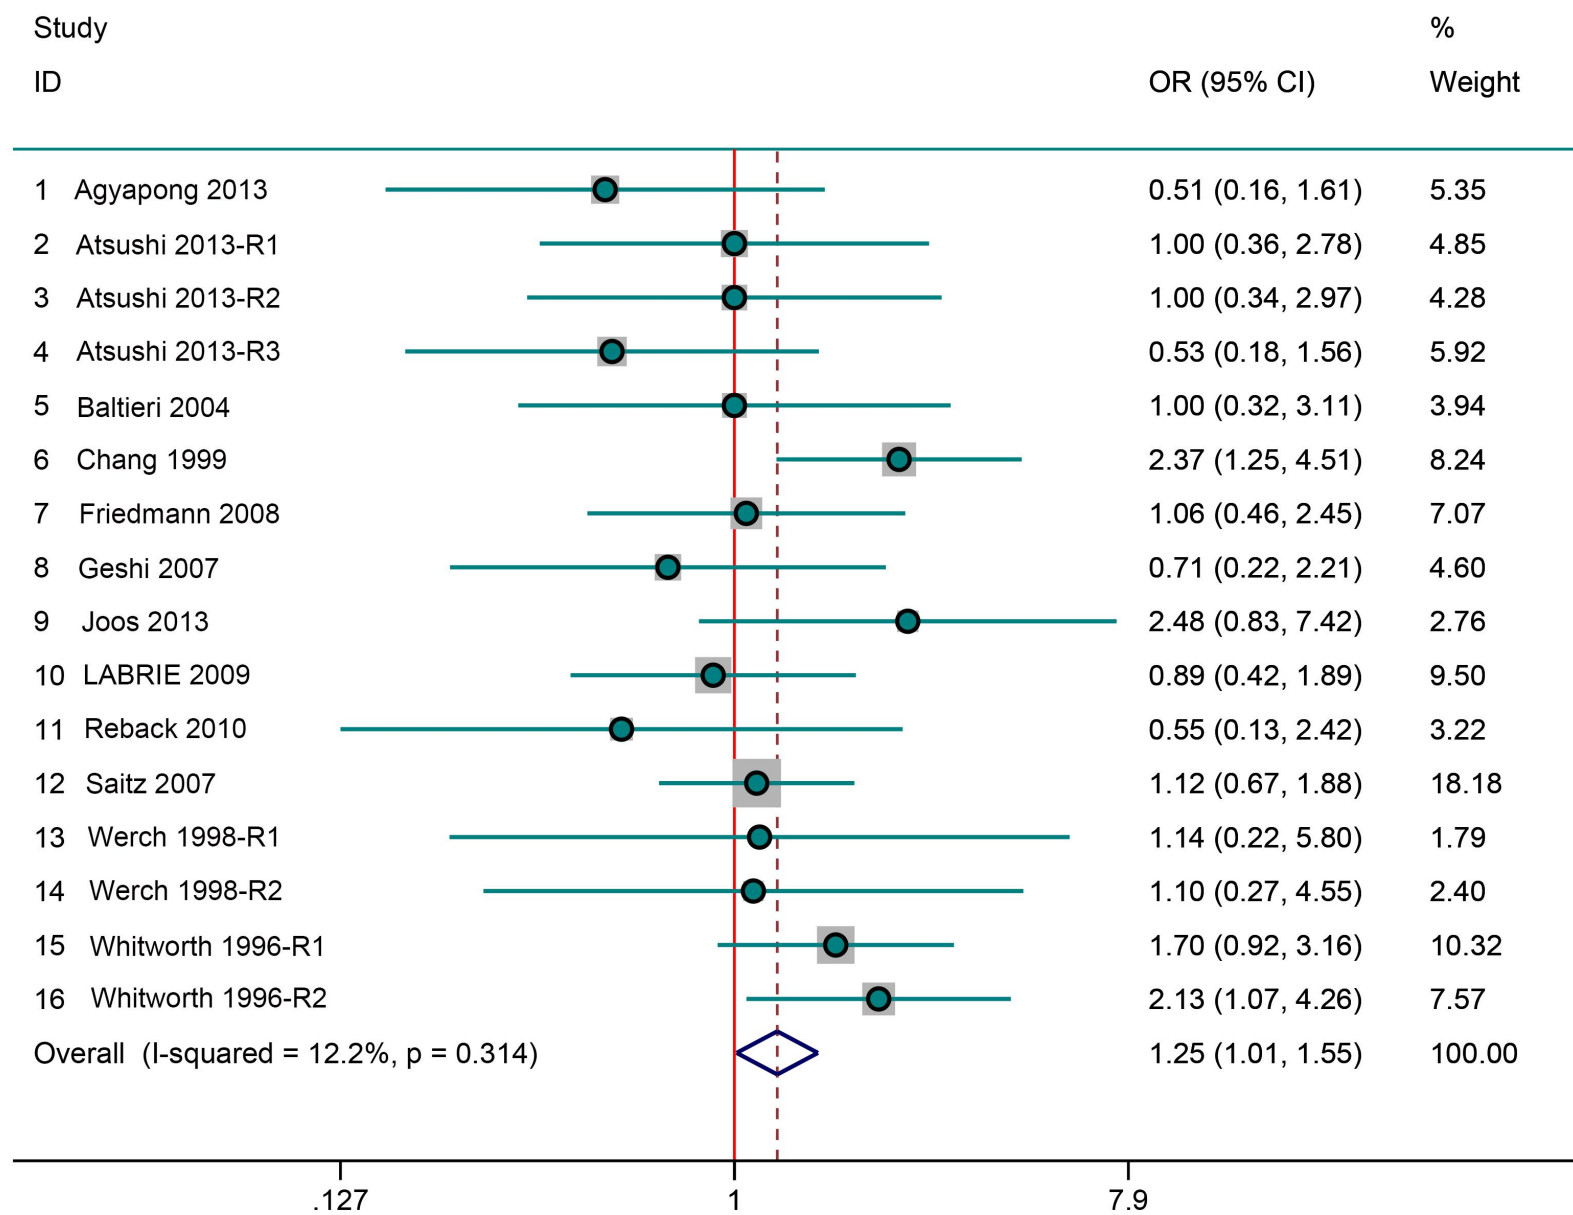



**Figure S4.** Direct meta-analysis of best rank intervention versus other interventions regarding the abstinence rates of (A) treatment sessions and (B) follow-up sessions. The detailed overall and subgroup effects were also exhibited in Table S7.

**Figure S4A.**

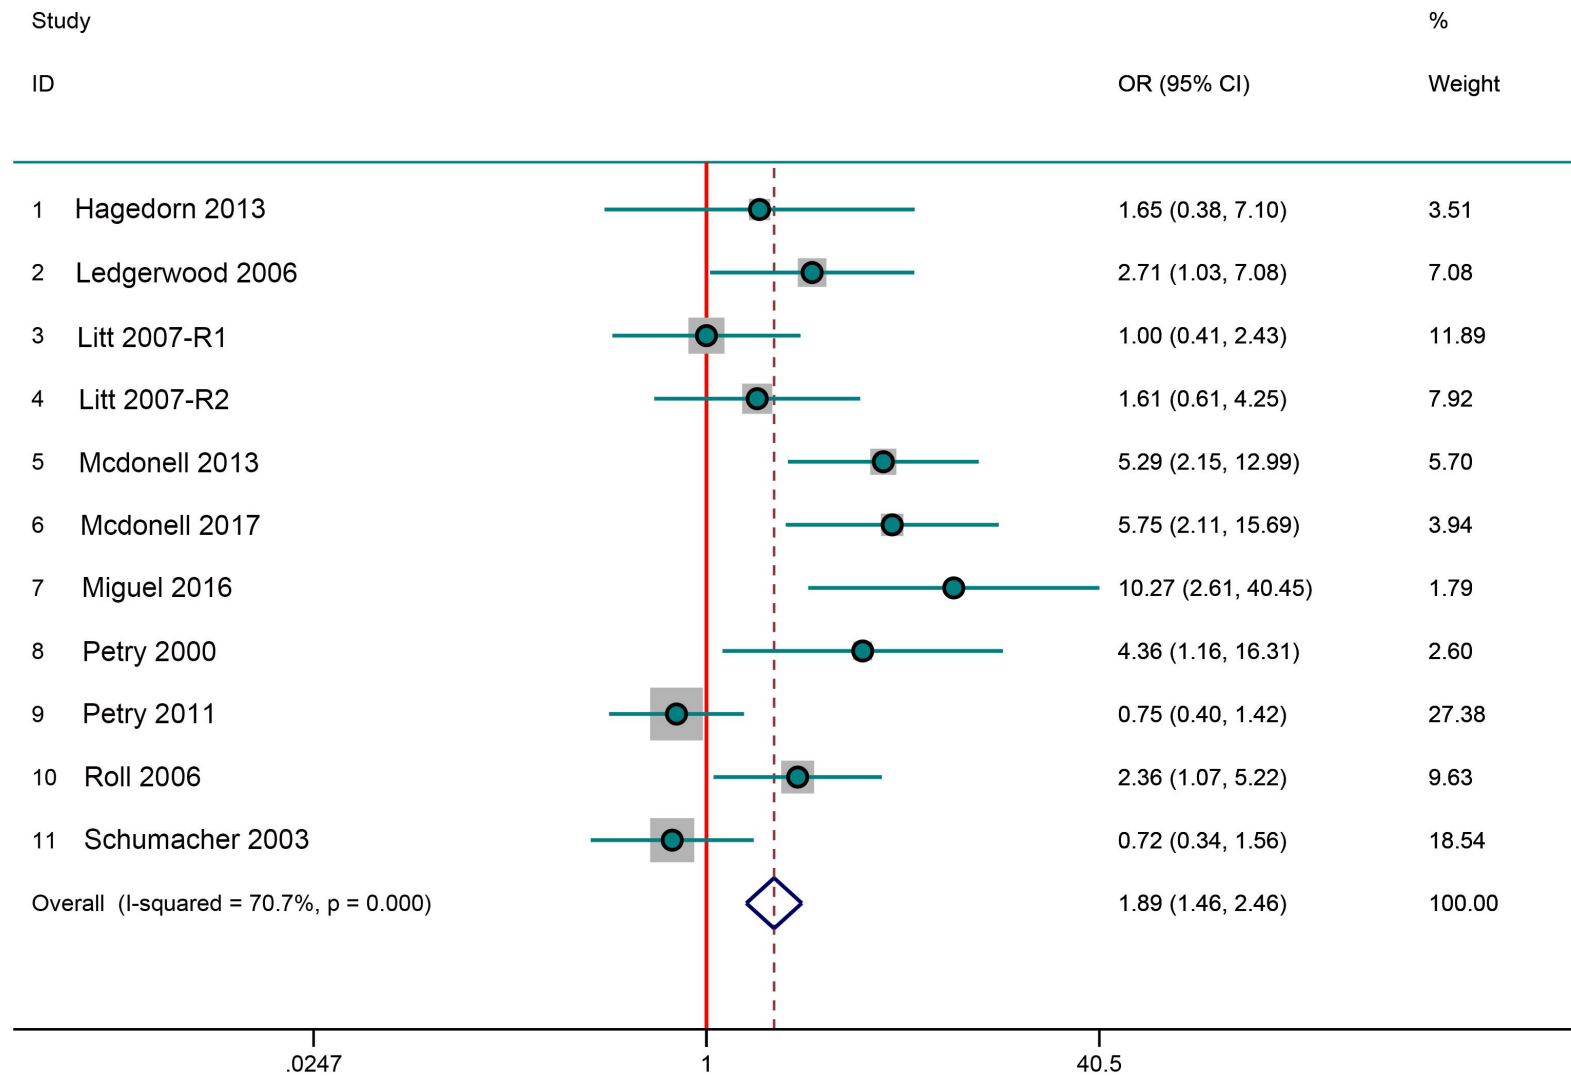

**Figure S4B.**

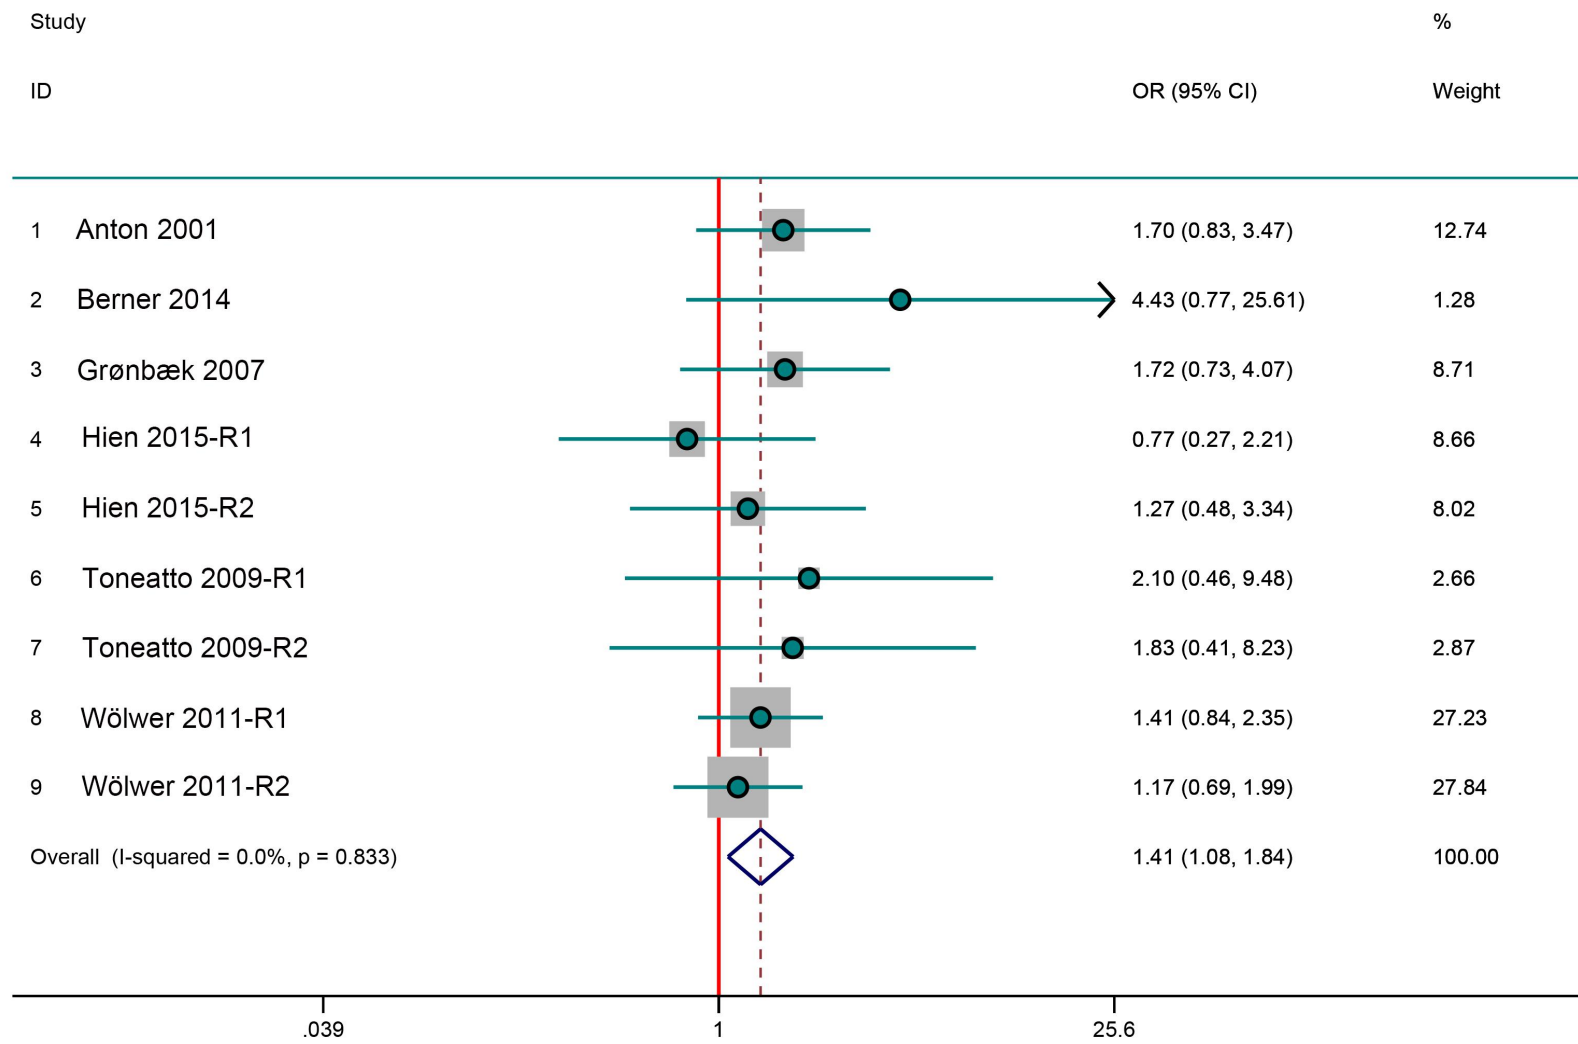



**Figure S5.** Publication bias of studies on abstinence rates regarding (A) treatment sessions and (B) follow-up sessions was assessed by funnel plots. All studies are centered on the summary effect estimate of their respective comparisons [ $\mu_{XY}$  (logOR for the present study)], which is represented by the vertical red line.

**Figure S5A.**

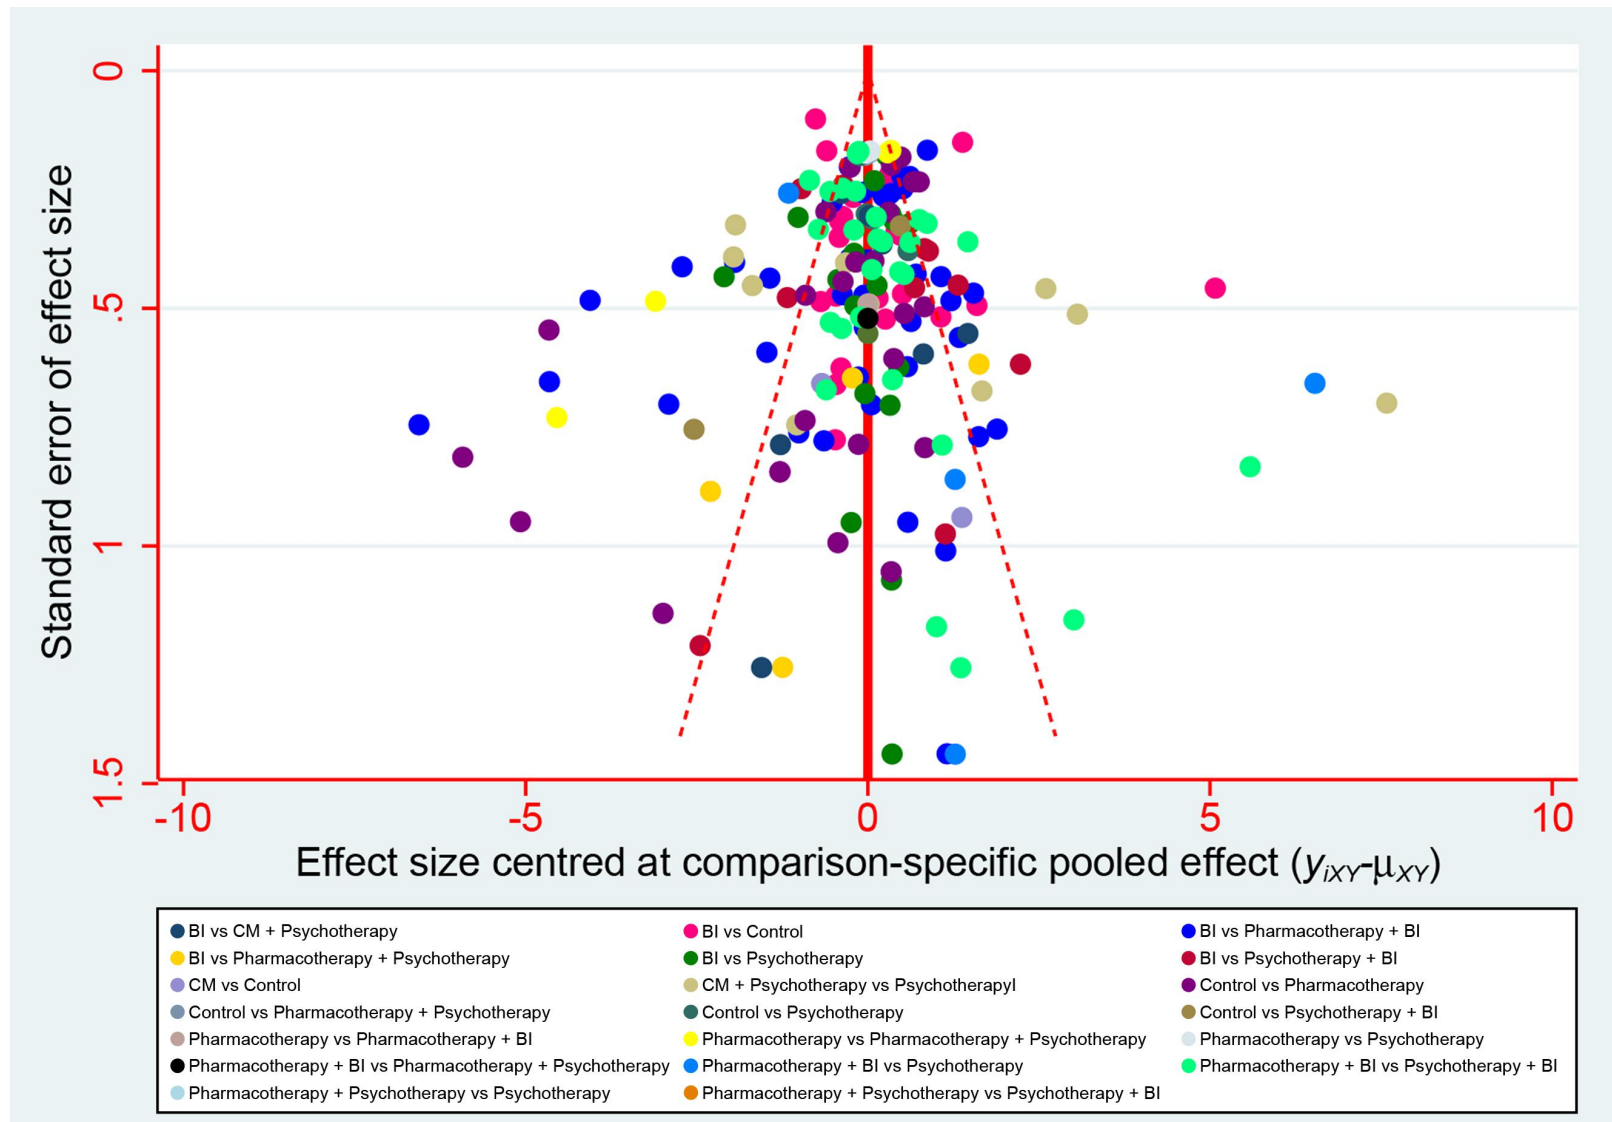

Figure S5B.

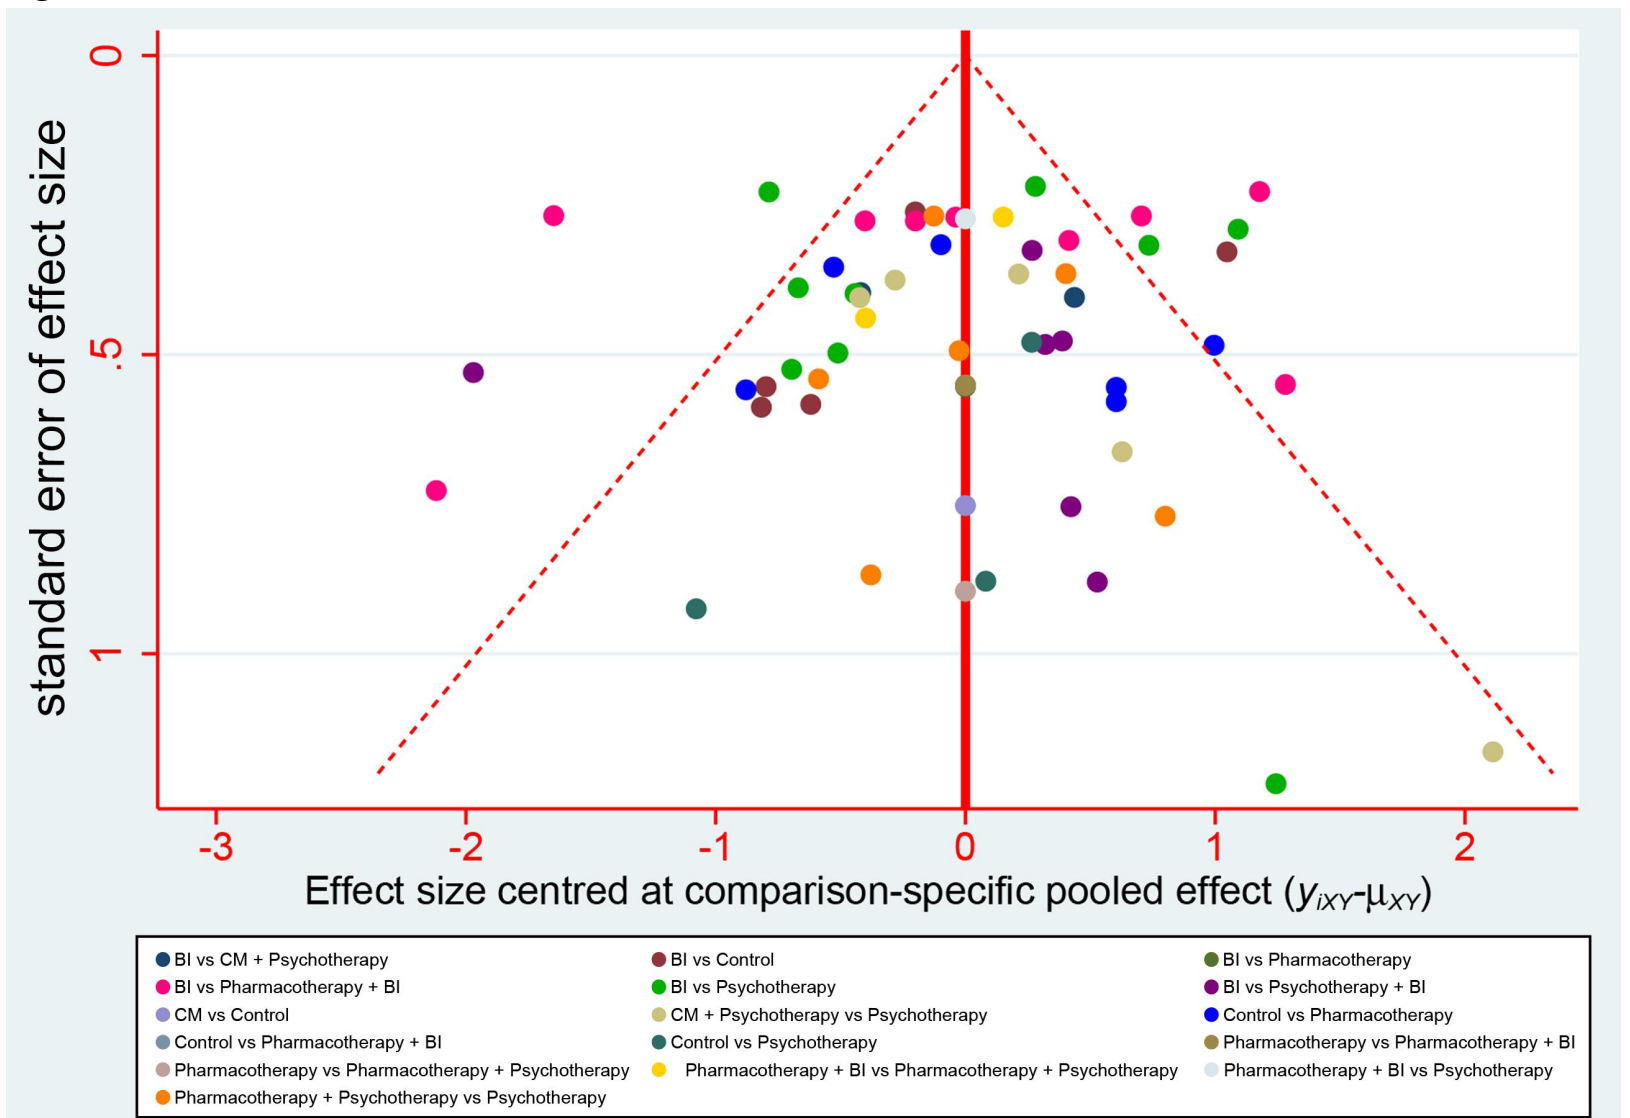

**Table S1.** Databases: MEDLINE. Citations were taken from 1964 to present (No publication status restriction).

| # No. | Search                                                                                                                                                                                                                                                                                                                                                                                                                                                                                                                                                | Results |
|-------|-------------------------------------------------------------------------------------------------------------------------------------------------------------------------------------------------------------------------------------------------------------------------------------------------------------------------------------------------------------------------------------------------------------------------------------------------------------------------------------------------------------------------------------------------------|---------|
| 1     | exp (alcohol) AND ((consumption) OR abuse) OR dependence) OR disorder)/                                                                                                                                                                                                                                                                                                                                                                                                                                                                               | 4767213 |
| 2     | exp binge drinking/                                                                                                                                                                                                                                                                                                                                                                                                                                                                                                                                   | 5080    |
| 3     | exp excessive drinking/                                                                                                                                                                                                                                                                                                                                                                                                                                                                                                                               | 3996    |
| 4     | 1 OR 2 OR 3                                                                                                                                                                                                                                                                                                                                                                                                                                                                                                                                           | 4796352 |
| 5     | (brief or brief intervention or BI). ti,ab.                                                                                                                                                                                                                                                                                                                                                                                                                                                                                                           | 1011824 |
| 6     | 5 AND 4                                                                                                                                                                                                                                                                                                                                                                                                                                                                                                                                               | 170724  |
| 7     | (mental intervention or psychological intervention or psychological support). ti,ab.                                                                                                                                                                                                                                                                                                                                                                                                                                                                  | 4170079 |
| 8     | (motivational interviewing or MI or motivational enhancement therapy or MET). ti,ab.                                                                                                                                                                                                                                                                                                                                                                                                                                                                  | 1565463 |
| 9     | (cognitive behavioral therapy or CBT or coping skills intervention). ti,ab.                                                                                                                                                                                                                                                                                                                                                                                                                                                                           | 117864  |
| 10    | (TSF or 12-Step Facilitation). ti,ab.                                                                                                                                                                                                                                                                                                                                                                                                                                                                                                                 | 1286    |
| 11    | (therapeutic community or TC or family therapy). ti,ab.                                                                                                                                                                                                                                                                                                                                                                                                                                                                                               | 6956    |
| 12    | (vocational rehabilitation or VR). ti,ab.                                                                                                                                                                                                                                                                                                                                                                                                                                                                                                             | 2355    |
| 13    | 7 OR 8 OR 9 OR 10 OR 11 OR 12                                                                                                                                                                                                                                                                                                                                                                                                                                                                                                                         | 2025513 |
| 14    | 13 AND 4                                                                                                                                                                                                                                                                                                                                                                                                                                                                                                                                              | 578426  |
| 15    | (pharmacotherapy or pharmacological intervention or medical intervention). ti,ab.                                                                                                                                                                                                                                                                                                                                                                                                                                                                     | 4684189 |
| 16    | ((5-HT (serotonin) partial agonists OR anticonvulsants OR antipsychotics OR benzodiazepines OR beta-blockers OR monoamine oxidase inhibitors (MAOIs) OR noradrenaline re-uptake inhibitors (NARIs) OR noradrenergic and specific serotonergic antidepressants (NaSSAs) OR reversible inhibitors of monoamine oxidase A (RIMAs) OR serotonin antagonist and re-uptake inhibitors (SARIs) OR serotonin and noradrenaline re-uptake inhibitors (SNRIs) OR selective serotonin re-uptake inhibitors (SSRIs) OR tricyclic antidepressants (TCAs))). ti,ab. | 11533   |
| 17    | 15 OR 16                                                                                                                                                                                                                                                                                                                                                                                                                                                                                                                                              | 4684442 |

|    |                                                                          |          |
|----|--------------------------------------------------------------------------|----------|
| 18 | 17 AND 4                                                                 | 1298644  |
| 19 | (acupuncture or moxibustion). ti,ab.                                     | 28011    |
| 20 | 19 AND 4                                                                 | 13938    |
| 21 | (contingency management or CM or behavioral economic supplement). ti,ab. | 350499   |
| 22 | 21 AND 4                                                                 | 71333    |
| 23 | (random or prospective). ti,ab.                                          | 1134069  |
| 24 | (randomized controlled trial). ti,ab.                                    | 589286   |
| 25 | 23 OR 24                                                                 | 1775771  |
| 26 | 6 OR 14 OR 18 OR 20 OR 22                                                | 7256376  |
| 27 | 25 AND 26                                                                | 3265426  |
| 28 | human.sh                                                                 | 17613440 |
| 29 | animal.sh.                                                               | 6343795  |
| 30 | 29 NOT 28                                                                | 5214790  |
| 31 | 27 NOT 30                                                                | 42369    |

**Table S2.** General information about the included RCTs. [BI: Brief Intervention; CM: Contingency Management; √: Marked as Available Data]

| Author          | Time of Pub. | Country   | Study Arms | Interventional Application |    |                 |               |         | Sample Size | Abstinent Rate    |                   |
|-----------------|--------------|-----------|------------|----------------------------|----|-----------------|---------------|---------|-------------|-------------------|-------------------|
|                 |              |           |            | BI                         | CM | Pharmacotherapy | Psychotherapy | Control |             | Treatment Session | Follow-up Session |
| Addolorato      | 2002         | Italy     | 2          | √                          |    | √               |               |         | 39          | √                 |                   |
| Addolorato      | 2007         | Italy     | 2          | √                          |    | √               |               |         | 84          | √                 |                   |
| Agyapong        | 2013         | Ireland   | 2          | √                          |    |                 |               | √       | 48          | √                 | √                 |
| Ahmadi          | 2004         | Iran      | 2          | √                          |    | √               |               |         | 116         | √                 |                   |
| Anton           | 1999         | USA       | 2          |                            |    | √               | √             |         | 131         | √                 |                   |
| Anton           | 2001         | USA       | 2          |                            |    | √               | √             |         | 131         | √                 | √                 |
| Anton           | 2004         | USA       | 2          |                            |    | √               | √             |         | 270         | √                 |                   |
| Anton           | 2005         | USA       | 4          |                            |    | √               | √             |         | 160         | √                 |                   |
| Anton           | 2006         | USA       | 4          |                            |    | √               | √             | √       | 1226        | √                 |                   |
| Anton           | 2008         | USA       | 2          |                            |    | √               | √             |         | 288         | √                 |                   |
| Arnedt          | 2011         | USA       | 2          | √                          |    |                 | √             |         | 17          | √                 |                   |
| Atsushi         | 2014         | Japan     | 4          | √                          |    | √               |               | √       | 109         |                   | √                 |
| Baker           | 2006         | Australia | 2          | √                          |    |                 | √             |         | 54          | √                 | √                 |
| Balldin         | 2003         | Sweden    | 4          | √                          |    | √               | √             |         | 118         | √                 |                   |
| Baltieri        | 2003         | Brazil    | 2          | √                          |    | √               |               |         | 75          | √                 | √                 |
| Baltieri        | 2004         | Brazil    | 2          |                            |    | √               |               | √       | 75          | √                 | √                 |
| Baltieri        | 2008         | Brazil    | 2          | √                          |    | √               |               |         | 155         | √                 |                   |
| Barnett         | 2017         | USA       | 2          |                            | √  |                 |               | √       | 29          | √                 |                   |
| Baumann         | 2015         | Germany   | 2          | √                          |    |                 |               | √       | 629         | √                 |                   |
| Bender          | 2006         | Germany   | 2          |                            |    | √               |               | √       | 299         | √                 |                   |
| Bendtsen        | 2012         | Sweden    | 2          | √                          |    |                 |               | √       | 2336        | √                 |                   |
| Berner          | 2014         | Germany   | 2          |                            |    | √               | √             |         | 96          | √                 | √                 |
| Blondell        | 2011         | USA       | 2          |                            |    |                 | √             | √       | 138         | √                 |                   |
| Carmody         | 2012         | USA       | 2          |                            |    |                 | √             | √       | 162         | √                 | √                 |
| Chang           | 1999         | USA       | 2          | √                          |    |                 |               | √       | 250         |                   | √                 |
| Charney         | 2015         | Canada    | 2          |                            |    | √               | √             |         | 265         | √                 |                   |
| Chick           | 2004         | UK        | 2          |                            |    | √               |               | √       | 492         | √                 |                   |
| Cornelius       | 1997         | USA       | 2          | √                          |    | √               |               |         | 51          | √                 |                   |
| Crits-Christoph | 2010         | USA       | 2          | √                          |    |                 |               | √       | 118         | √                 |                   |
| Davis           | 2002         | USA       | 2          | √                          |    |                 |               | √       | 84          | √                 |                   |
| Dongier         | 1991         | Canada    | 2          |                            |    | √               |               | √       | 23          | √                 |                   |
| Drummond        | 2017         | UK        | 2          | √                          |    |                 | √             |         | 94          | √                 |                   |
| Elder           | 2002         | USA       | 2          | √                          |    |                 |               | √       | 630         | √                 |                   |
| Fawcett         | 1987         | USA       | 2          |                            |    | √               |               | √       | 104         | √                 |                   |
| Fertig          | 2012         | USA       | 2          | √                          |    | √               |               |         | 130         | √                 |                   |
| Friedmann       | 2008         | USA       | 2          |                            |    | √               |               | √       | 173         |                   | √                 |
| Fuller          | 1979         | USA       | 2          | √                          |    | √               |               |         | 128         | √                 |                   |
| Gallimberti     | 1992         | Italy     | 2          |                            |    | √               |               | √       | 71          | √                 |                   |
| Garbutt         | 2010         | USA       | 2          |                            |    | √               |               | √       | 80          | √                 |                   |

|                 |      |           |   |   |   |   |   |   |     |   |   |
|-----------------|------|-----------|---|---|---|---|---|---|-----|---|---|
| Geshi           | 2007 | Japan     | 2 | √ |   |   |   | √ | 71  |   | √ |
| GOTTLIEB        | 1994 | USA       | 2 | √ |   | √ |   |   | 100 | √ |   |
| Grønbæk         | 2007 | Denmark   | 2 | √ |   | √ | √ |   | 87  |   | √ |
| Gual            | 2003 | Spain     | 2 |   |   | √ |   | √ | 83  | √ |   |
| Guardia         | 2002 | Spain     | 2 | √ |   | √ |   |   | 202 | √ |   |
| Guardia         | 2004 | Spain     | 2 |   |   | √ | √ |   | 60  | √ |   |
| Gustafson       | 2014 | USA       | 2 | √ |   |   |   | √ | 349 | √ |   |
| Hagedorn        | 2013 | USA       | 2 |   | √ |   | √ |   | 191 | √ | √ |
| Haskins         | 2017 | USA       | 2 | √ |   |   |   | √ | 212 | √ |   |
| Hernandez-Avila | 2004 | USA       | 2 | √ |   | √ |   |   | 41  | √ |   |
| Hien            | 2015 | USA       | 2 |   |   | √ | √ |   | 69  | √ | √ |
| Johnson         | 2007 | USA       | 2 |   |   | √ | √ |   | 364 | √ |   |
| Joos            | 2013 | Belgium   | 2 |   |   | √ |   | √ | 83  | √ | √ |
| Kabel           | 1996 | USA       | 2 |   |   | √ |   | √ | 28  | √ |   |
| Kampman         | 2007 | USA       | 2 |   |   | √ | √ |   | 61  | √ |   |
| Kay-Lambkin     | 2011 | Australia | 2 | √ |   |   | √ |   | 274 | √ |   |
| Kelly           | 2014 | Kenya     | 2 | √ |   |   |   | √ | 752 | √ |   |
| Kimberly        | 2012 | USA       | 2 | √ |   |   | √ |   | 117 | √ |   |
| Kranzler        | 1995 | USA       | 2 |   |   | √ |   | √ | 40  | √ |   |
| Kranzler (2)    | 1995 | USA       | 2 |   |   | √ | √ |   | 94  | √ |   |
| Kranzler        | 2000 | USA       | 2 |   |   | √ | √ |   | 183 | √ |   |
| Kranzler        | 2004 | USA       | 2 |   |   | √ | √ |   | 315 | √ |   |
| LABRIE          | 2009 | USA       | 2 |   |   |   | √ | √ | 285 | √ | √ |
| Latt            | 2002 | Australia | 2 | √ |   | √ |   |   | 107 | √ |   |
| Ledgerwood      | 2006 | USA       | 2 |   | √ |   | √ |   | 142 | √ |   |
| Liddle          | 2008 | USA       | 2 | √ |   |   | √ |   | 224 | √ | √ |
| Litt            | 2003 | USA       | 2 | √ |   |   | √ |   | 128 | √ | √ |
| Litt            | 2007 | USA       | 3 | √ | √ |   | √ |   | 195 | √ | √ |
| Litten          | 2012 | USA       | 2 | √ |   | √ |   |   | 215 | √ |   |
| Litten          | 2013 | USA       | 2 | √ |   | √ |   |   | 197 | √ |   |
| Lucht           | 2014 | Germany   | 2 | √ |   |   |   | √ | 80  | √ |   |
| Malcolm         | 1992 | USA       | 2 |   |   | √ |   | √ | 67  | √ |   |
| Manning         | 2016 | Australia | 2 | √ |   |   | √ |   | 83  | √ |   |
| Marra           | 2002 | France    | 2 | √ |   | √ |   |   | 31  | √ |   |
| MARTENS         | 2015 | USA       | 2 | √ |   |   |   | √ | 325 | √ |   |
| Mason           | 2006 | USA       | 2 | √ |   | √ |   |   | 592 | √ |   |
| Mcdonell        | 2013 | USA       | 2 |   | √ |   | √ |   | 176 | √ |   |
| Mcdonell        | 2017 | USA       | 2 |   | √ |   | √ |   | 79  | √ |   |
| McGrath         | 1996 | USA       | 2 | √ |   | √ |   |   | 56  | √ |   |
| Mckay           | 2005 | USA       | 2 | √ |   |   | √ |   | 359 | √ | √ |
| Miguel          | 2016 | Brazil    | 2 |   | √ |   | √ |   | 65  | √ |   |
| Miller          | 1981 | USA       | 2 | √ |   |   | √ |   | 31  | √ | √ |

|              |      |             |   |   |   |   |   |   |     |   |   |
|--------------|------|-------------|---|---|---|---|---|---|-----|---|---|
| Mills        | 2012 | Australia   | 2 | √ |   |   | √ |   | 103 | √ | √ |
| Moore        | 2013 | UK          | 2 | √ |   |   |   | √ | 554 | √ |   |
| Morley       | 2006 | Australia   | 2 | √ |   | √ |   |   | 94  | √ |   |
| Morley       | 2014 | Australia   | 2 |   |   | √ | √ |   | 42  | √ |   |
| Morris       | 2001 | Australia   | 2 |   |   | √ |   | √ | 71  | √ |   |
| Mueller      | 1997 | USA         | 2 |   |   | √ |   | √ | 27  | √ |   |
| Müller       | 2015 | Germany     | 2 | √ |   | √ |   |   | 56  | √ | √ |
| Mundt        | 2006 | USA         | 3 | √ |   |   |   | √ | 60  | √ |   |
| Nadkarni     | 2017 | India       | 2 | √ |   |   | √ |   | 336 | √ |   |
| Nadkarni (2) | 2017 | India       | 2 | √ |   |   | √ |   | 316 | √ |   |
| Namkoong     | 2003 | South Korea | 2 |   |   | √ | √ |   | 142 | √ |   |
| Neto         | 2008 | Portugal    | 2 | √ |   |   | √ |   | 209 | √ |   |
| Niederhofer  | 2003 | Austria     | 2 |   |   | √ |   | √ | 26  | √ |   |
| O'Malley     | 1992 | USA         | 3 | √ |   | √ | √ |   | 104 | √ |   |
| O'Malley     | 2007 | Ireland     | 2 |   |   | √ | √ |   | 93  | √ |   |
| O'Malley     | 2008 | USA         | 2 | √ |   | √ |   |   | 101 | √ |   |
| Oslin        | 1997 | USA         | 2 | √ |   | √ |   |   | 44  | √ |   |
| Oslin        | 2005 | USA         | 2 | √ |   | √ |   |   | 74  | √ |   |
| Paille       | 1995 | France      | 2 | √ |   | √ |   |   | 438 | √ | √ |
| PELC         | 1997 | Belgium     | 2 | √ |   | √ |   |   | 188 | √ |   |
| PELC         | 2005 | France      | 2 | √ |   | √ |   |   | 100 | √ |   |
| Petrakis     | 2006 | USA         | 2 |   |   | √ | √ |   | 254 | √ |   |
| Petry        | 2000 | USA         | 2 |   | √ |   | √ |   | 42  | √ |   |
| Petry        | 2011 | USA         | 2 |   | √ |   | √ |   | 244 | √ |   |
| Pettinati    | 2001 | USA         | 2 | √ |   | √ |   |   | 100 | √ |   |
| Pettinati    | 2008 | USA         | 2 |   |   | √ | √ |   | 208 | √ |   |
| Pettinati    | 2010 | USA         | 2 |   |   | √ | √ |   | 170 | √ |   |
| Pettinati    | 2014 | USA         | 2 |   |   | √ | √ |   | 80  | √ |   |
| Poldrugo     | 1997 | Italy       | 2 | √ |   | √ |   |   | 246 | √ | √ |
| Rash         | 2008 | USA         | 2 |   | √ |   | √ |   | 208 |   | √ |
| Reback       | 2010 | USA         | 2 |   | √ |   |   | √ | 131 | √ | √ |
| Richter      | 2012 | Germany     | 2 |   |   | √ |   | √ | 201 | √ |   |
| Roll         | 2006 | USA         | 2 |   | √ |   | √ |   | 113 | √ |   |
| Saitz        | 2007 | USA         | 2 | √ |   |   |   | √ | 287 |   | √ |
| Saitz        | 2013 | USA         | 2 | √ |   |   | √ |   | 532 | √ |   |
| Sass         | 1996 | Germany     | 2 | √ |   | √ |   |   | 272 | √ | √ |
| Schumacher   | 2003 | UK          | 2 |   | √ |   | √ |   | 127 | √ |   |
| Signor       | 2013 | Brazil      | 2 | √ |   |   |   | √ | 147 | √ |   |
| Sinadinovic  | 2014 | Sweden      | 3 | √ |   |   | √ | √ | 633 | √ |   |
| Stein        | 2010 | USA         | 2 | √ |   |   |   | √ | 245 | √ |   |
| Stephanie    | 2003 | USA         | 4 | √ |   | √ | √ |   | 113 | √ |   |
| Tempesta     | 2000 | Italy       | 2 | √ |   | √ |   |   | 329 | √ | √ |



|             |      |            |   |   |  |   |   |   |     |   |   |
|-------------|------|------------|---|---|--|---|---|---|-----|---|---|
| Tolliver    | 2012 | USA        | 2 |   |  | √ |   | √ | 33  | √ |   |
| Toneatto    | 2009 | Canada     | 2 |   |  | √ | √ |   | 52  | √ | √ |
| Upshur      | 2015 | USA        | 2 | √ |  |   |   | √ | 76  | √ |   |
| Utter       | 2014 | USA        | 2 | √ |  |   |   | √ | 181 | √ |   |
| Volpicelli  | 1992 | Canada     | 2 |   |  | √ |   | √ | 70  | √ |   |
| Volpicelli  | 1997 | Canada     | 2 | √ |  | √ |   |   | 97  | √ |   |
| Werch       | 1998 | USA        | 2 |   |  |   | √ | √ | 211 | √ | √ |
| Whitworth   | 1996 | Austria    | 2 |   |  | √ |   | √ | 448 | √ | √ |
| Wiesbeck    | 2001 | Germany    | 2 | √ |  | √ |   |   | 281 | √ | √ |
| Wildt       | 2002 | Netherland | 2 | √ |  | √ | √ |   | 241 | √ |   |
| Willenbring | 1999 | USA        | 2 | √ |  |   |   | √ | 75  | √ |   |
| Winters     | 2012 | USA        | 2 | √ |  |   | √ | √ | 315 | √ |   |
| Winters     | 2014 | USA        | 2 | √ |  |   | √ | √ | 280 | √ |   |
| Wölwer      | 2011 | Germany    | 3 | √ |  | √ | √ |   | 371 | √ | √ |

## References

1. Addolorato G, Caputo F, Capristo E, et al. Baclofen efficacy in reducing alcohol craving and intake: a preliminary double-blind randomized controlled study. *Alcohol Alcohol.* 2002;37(5):504-8.
2. Addolorato G, Leggio L, Ferrulli A, et al. Effectiveness and safety of baclofen for maintenance of alcohol abstinence in alcohol-dependent patients with liver cirrhosis: randomised, double-blind controlled study. *Lancet.* 2007;370(9603):1915-22.
3. Agyapong VI, McLoughlin DM, Farren CK. Six-months outcomes of a randomised trial of supportive text messaging for depression and comorbid alcohol use disorder. *J Affect Disord.* 2013;151(1):100-4.
4. Ahmadi J, Babaebeigi M, Maany I, et al. Naltrexone for alcohol-dependent patients. *Ir J Med Sci.* 2004;173(1):34-7.
5. Anton RF, Moak DH, Waid LR, et al. Naltrexone and cognitive behavioral therapy for the treatment of outpatient alcoholics: results of a placebo-controlled trial. *Am J Psychiatry.* 1999;156(11):1758-64.
6. Anton RF, Moak DH, Latham PK, et al. Posttreatment results of combining naltrexone with cognitive-behavior therapy for the treatment of alcoholism. *J Clin Psychopharmacol.* 2001;21(1):72-7.
7. Anton RF, Pettinati H, Zweben A, et al. A multi-site dose ranging study of nalmefene in the treatment of alcohol dependence. *J Clin Psychopharmacol.* 2004;24(4):421-8.
8. Anton RF, Moak DH, Latham P, et al. Naltrexone combined with either cognitive behavioral or motivational enhancement therapy for alcohol dependence. *J Clin Psychopharmacol.* 2005;25(4):349-57.
9. Anton RF, O'Malley SS, Ciraulo DA, et al. Combined pharmacotherapies and behavioral interventions for alcohol dependence: the COMBINE study: a randomized controlled trial. *JAMA.* 2006;295(17):2003-17.
10. Anton RF, Kranzler H, Breder C, et al. A randomized, multicenter, double-blind, placebo-controlled study of the efficacy and safety of aripiprazole for the treatment of alcohol dependence. *J Clin Psychopharmacol.* 2008;28(1):5-12.
11. Arnedt JT, Conroy DA, Armitage R, Brower KJ. Cognitive-behavioral therapy for insomnia in alcohol dependent patients: a randomized controlled pilot trial. *Behav Res Ther.*

2011;49(4):227-33.

12. Yoshimura A, Kimura M, Nakayama H, et al. Efficacy of disulfiram for the treatment of alcohol dependence assessed with a multicenter randomized controlled trial. *Alcohol Clin Exp Res*. 2014;38(2):572-8.
13. Baker A, Bucci S, Lewin TJ, et al. Cognitive-behavioural therapy for substance use disorders in people with psychotic disorders: Randomised controlled trial. *Br J Psychiatry*. 2006;188:439-48.
14. Balldin J, Berglund M, Borg S, et al. A 6-month controlled naltrexone study: combined effect with cognitive behavioral therapy in outpatient treatment of alcohol dependence. *Alcohol Clin Exp Res*. 2003;27(7):1142-9.
15. Baltieri DA, de Andrade AG. Efficacy of acamprosate in the treatment of alcohol-dependent outpatients. *Rev Bras Psiquiatr*. 2003;25(3):156-9.
16. Baltieri DA, De Andrade AG. Acamprosate in alcohol dependence: a randomized controlled efficacy study in a standard clinical setting. *J Stud Alcohol*. 2004;65(1):136-9.
17. Baltieri DA, Daró FR, Ribeiro PL, de Andrade AG. Comparing topiramate with naltrexone in the treatment of alcohol dependence. *Addiction*. 2008;103(12):2035-44.
18. Barnett NP, Celio MA, Tidey JW, et al. A preliminary randomized controlled trial of contingency management for alcohol use reduction using a transdermal alcohol sensor. *Addiction*. 2017;112(6):1025-1035.
19. Baumann S, Gaertner B, Schnuerer I, et al. The impact of a stage tailored intervention on alcohol use trajectories among those who do not intend to change. *Drug Alcohol Depend*. 2015;147:167-74.
20. Bender S, Scherbaum N, Soyka M, et al. The efficacy of the dopamine D2/D3 antagonist tiapride in maintaining abstinence: a randomized, double-blind, placebo-controlled trial in 299 alcohol-dependent patients. *Int J Neuropsychopharmacol*. 2007;10(5):653-60.
21. Bendtsen P, McCambridge J, Bendtsen M, et al. Effectiveness of a proactive mail-based alcohol Internet intervention for university students: dismantling the assessment and feedback components in a randomized controlled trial. *J Med Internet Res*. 2012;14(5):e142.
22. Berner MM, Wahl S, Brueck R, et al. The place of additional individual psychotherapy in the treatment of alcoholism: a randomized controlled study in nonresponders to anticraving medication-results of the PREDICT study. *Alcohol Clin Exp Res*. 2014;38(4):1118-25.
23. Blondell RD, Frydrych LM, Jaanimagi U, et al. A randomized trial of two behavioral interventions to improve outcomes following inpatient detoxification for alcohol dependence. *J Addict Dis*. 2011;30(2):136-48.
24. Carmody TP, Delucchi K, Duncan CL, et al. Intensive intervention for alcohol-dependent smokers in early recovery: a randomized trial. *Drug Alcohol Depend*. 2012;122(3):186-94.
25. Chang G, Wilkins-Haug L, Berman S, Goetz MA. Brief intervention for alcohol use in pregnancy: a randomized trial. *Addiction*. 1999;94(10):1499-508.
26. Charney DA, Heath LM, Zikos E, et al. Poorer Drinking Outcomes with Citalopram Treatment for Alcohol Dependence: A Randomized, Double-Blind, Placebo-Controlled Trial. *Alcohol Clin Exp Res*. 2015;39(9):1756-65.
27. Chick J, Aschauer H, Hornik K; Investigators' Group. Efficacy of fluvoxamine in preventing relapse in alcohol dependence: a one-year, double-blind, placebo controlled multicentre study with analysis by typology. *Drug Alcohol Depend*. 2004;74(1):61-70.
28. Cornelius JR, Salloum IM, Ehler JG, et al. Fluoxetine in depressed alcoholics. A double-blind, placebo-controlled trial. *Arch Gen Psychiatry*. 1997;54(8):700-5.
29. Crits-Christoph P, Ring-Kurtz S, McClure B, et al. A randomized controlled study of a web-based performance improvement system for substance abuse treatment providers. *J Subst Abuse Treat*. 2010;38(3):251-62.

30. Davis WT, Campbell L, Tax J, Lieber CS. A trial of "standard" outpatient alcoholism treatment vs. a minimal treatment control. *J Subst Abuse Treat.* 2002;23(1):9-19.
31. Dongier M, Vachon L, Schwartz G. Bromocriptine in the treatment of alcohol dependence. *Alcohol Clin Exp Res.* 1991;15(6):970-7.
32. Drummond C, Gilbert H, Burns T, et al. Assertive Community Treatment For People With Alcohol Dependence: A Pilot Randomized Controlled Trial. *Alcohol Alcohol.* 2017;52(2):234-241.
33. Elder JP, Litrownik AJ, Slymen DJ, et al. Tobacco and alcohol use-prevention program for Hispanic migrant adolescents. *Am J Prev Med.* 2002;23(4):269-75.
34. Fawcett J, Clark DC, Aagesen CA, et al. A double-blind, placebo-controlled trial of lithium carbonate therapy for alcoholism. *Arch Gen Psychiatry.* 1987;44(3):248-56.
35. Fertig JB, Ryan ML, Falk DE, et al. A double-blind, placebo-controlled trial assessing the efficacy of levetiracetam extended-release in very heavy drinking alcohol-dependent patients. *Alcohol Clin Exp Res.* 2012;36(8):1421-30.
36. Friedmann PD, Rose JS, Swift R, et al. Trazodone for sleep disturbance after alcohol detoxification: a double-blind, placebo-controlled trial. *Alcohol Clin Exp Res.* 2008;32(9):1652-60.
37. Fuller RK, Roth HP. Disulfiram for the treatment of alcoholism. An evaluation in 128 men. *Ann Intern Med.* 1979;90(6):901-4.
38. Gallimberti L, Ferri M, Ferrara SD, et al. Gamma-Hydroxybutyric acid in the treatment of alcohol dependence: a double-blind study. *Alcohol Clin Exp Res.* 1992;16(4):673-6.
39. Garbutt JC, Kampov-Polevoy AB, Gallop R, et al. Efficacy and safety of baclofen for alcohol dependence: a randomized, double-blind, placebo-controlled trial. *Alcohol Clin Exp Res.* 2010;34(11):1849-57.
40. Geshi M, Hirokawa K, Taniguchi T, et al. Effects of alcohol-related health education on alcohol and drinking behavior awareness among Japanese junior college students: a randomized controlled trial. *Acta Med Okayama.* 2007;61(6):345-54.
41. Gottlieb LD, Horwitz RI, Kraus ML, et al. Randomized controlled trial in alcohol relapse prevention: role of atenolol, alcohol craving, and treatment adherence. *J Subst Abuse Treat.* 1994;11(3):253-8.
42. Grønbaek M, Nielsen B. A randomized controlled trial of Minnesota day clinic treatment of alcoholics. *Addiction.* 2007;102(3):381-8.
43. Gual A, Balcells M, Torres M, et al. Sertraline for the prevention of relapse in detoxicated alcohol dependent patients with a comorbid depressive disorder: a randomized controlled trial. *Alcohol Alcohol.* 2003;38(6):619-25.
44. Guardia J, Caso C, Arias F, et al. A double-blind, placebo-controlled study of naltrexone in the treatment of alcohol-dependence disorder: results from a multicenter clinical trial. *Alcohol Clin Exp Res.* 2002;26(9):1381-7.
45. Guardia J, Segura L, Gonzalvo B, et al. A double-blind, placebo-controlled study of olanzapine in the treatment of alcohol-dependence disorder. *Alcohol Clin Exp Res.* 2004;28(5):736-45.
46. Gustafson DH, McTavish FM, Chih MY, et al. A smartphone application to support recovery from alcoholism: a randomized clinical trial. *JAMA Psychiatry.* 2014;71(5):566-72.
47. Hagedorn HJ, Noorbaloochi S, Simon AB, et al. Rewarding early abstinence in Veterans Health Administration addiction clinics. *J Subst Abuse Treat.* 2013;45(1):109-17.
48. Haskins BL, Davis-Martin R, Abar B, et al. Health Evaluation and Referral Assistant: A Randomized Controlled Trial of a Web-Based Screening, Brief Intervention, and Referral to Treatment System to Reduce Risky Alcohol Use Among Emergency Department Patients. *J Med Internet Res.* 2017;19(5):e119.
49. Hernandez-Avila CA, Modesto-Lowe V, Feinn R, Kranzler HR. Nefazodone treatment of comorbid alcohol dependence and major depression. *Alcohol Clin Exp Res.* 2004;28(3):433-40.

50. Hien DA, Levin FR, Ruglass LM, et al. Combining seeking safety with sertraline for PTSD and alcohol use disorders: A randomized controlled trial. *J Consult Clin Psychol.* 2015;83(2):359-69.
51. Johnson BA, Rosenthal N, Capece JA, et al. Topiramate for treating alcohol dependence: a randomized controlled trial. *JAMA.* 2007;298(14):1641-51.
52. Joos L, Goudriaan AE, Schmaal L, et al. Effect of modafinil on impulsivity and relapse in alcohol dependent patients: a randomized, placebo controlled trial. *Eur Neuropsychopharmacol.* 2013;23(8):948-55.
53. Kabel DI, Petty F. A placebo-controlled, double-blind study of fluoxetine in severe alcohol dependence: adjunctive pharmacotherapy during and after inpatient treatment. *Alcohol Clin Exp Res.* 1996;20(4):780-4.
54. Kampman KM, Pettinati HM, Lynch KG, et al. A double-blind, placebo-controlled pilot trial of quetiapine for the treatment of Type A and Type B alcoholism. *J Clin Psychopharmacol.* 2007;27(4):344-51.
55. Kay-Lambkin FJ, Baker AL, Kelly B, Lewin TJ. Clinician-assisted computerised versus therapist-delivered treatment for depressive and addictive disorders: a randomised controlled trial. *Med J Aust.* 2011;195(3):S44-50.
56. L'Engle KL, Mwarogo P, Kingola N, et al. A randomized controlled trial of a brief intervention to reduce alcohol use among female sex workers in Mombasa, Kenya. *J Acquir Immune Defic Syndr.* 2014;67(4):446-53.
57. Yonkers KA, Forray A, Howell HB, et al. Motivational enhancement therapy coupled with cognitive behavioral therapy versus brief advice: a randomized trial for treatment of hazardous substance use in pregnancy and after delivery. *Gen Hosp Psychiatry.* 2012;34(5):439-49.
58. Kranzler HR, Bauer LO, Hersh D, Klinghoffer V. Carbamazepine treatment of cocaine dependence: a placebo-controlled trial. *Drug Alcohol Depend.* 1995;38(3):203-11.
59. Kranzler HR, Bursleson JA, Korner P, et al. Placebo-controlled trial of fluoxetine as an adjunct to relapse prevention in alcoholics. *Am J Psychiatry.* 1995;152(3):391-7.
60. Kranzler HR, Modesto-Lowe V, Van Kirk J. Naltrexone vs. nefazodone for treatment of alcohol dependence. A placebo-controlled trial. *Neuropsychopharmacology.* 2000;22(5):493-503.
61. Kranzler HR, Wesson DR, Billot L, et al. Naltrexone depot for treatment of alcohol dependence: a multicenter, randomized, placebo-controlled clinical trial. *Alcohol Clin Exp Res.* 2004;28(7):1051-9.
62. LaBrie JW, Huchting KK, Lac A, et al. Preventing risky drinking in first-year college women: further validation of a female-specific motivational enhancement group intervention. *J Stud Alcohol Drugs Suppl.* 2009;(16):77-85.
63. Latt NC, Jurd S, Houseman J, et al. Naltrexone in alcohol dependence: a randomised controlled trial of effectiveness in a standard clinical setting. *Med J Aust.* 2002;176(11):530-4.
64. Ledgerwood DM, Petry NM. Does contingency management affect motivation to change substance use? *Drug Alcohol Depend.* 2006;83(1):65-72.
65. Liddle HA, Dakof GA, Turner RM, et al. Treating adolescent drug abuse: a randomized trial comparing multidimensional family therapy and cognitive behavior therapy. *Addiction.* 2008;103(10):1660-70.
66. Litt MD, Kadden RM, Cooney NL, Kabela E. Coping skills and treatment outcomes in cognitive-behavioral and interactional group therapy for alcoholism. *J Consult Clin Psychol.* 2003;71(1):118-28.
67. Litt MD, Kadden RM, Kabela-Cormier E, et al. Changing network support for drinking: initial findings from the network support project. *J Consult Clin Psychol.* 2007;75(4):542-55.

68. Litten RZ, Fertig JB, Falk DE, et al. A double-blind, placebo-controlled trial to assess the efficacy of quetiapine fumarate XR in very heavy drinking alcohol-dependent patients. *Alcohol Clin Exp Res.* 2012;36(3):406-16.
69. Litten RZ, Ryan ML, Fertig JB, et al. A double-blind, placebo-controlled trial assessing the efficacy of varenicline tartrate for alcohol dependence. *J Addict Med.* 2013;7(4):277-86.
70. Lucht MJ, Hoffman L, Haug S, et al. A surveillance tool using mobile phone short message service to reduce alcohol consumption among alcohol-dependent patients. *Alcohol Clin Exp Res.* 2014;38(6):1728-36.
71. Malcolm R, Anton RF, Randall CL, et al. A placebo-controlled trial of buspirone in anxious inpatient alcoholics. *Alcohol Clin Exp Res.* 1992;16(6):1007-13.
72. Manning V, Staiger PK, Hall K, et al. Cognitive Bias Modification Training During Inpatient Alcohol Detoxification Reduces Early Relapse: A Randomized Controlled Trial. *Alcohol Clin Exp Res.* 2016;40(9):2011-9.
73. Marra D, Warot D, Berlin I, et al. Amisulpride does not prevent relapse in primary alcohol dependence: results of a pilot randomized, placebo-controlled trial. *Alcohol Clin Exp Res.* 2002;26(10):1545-52.
74. Martens MP, Cadigan JM, Rogers RE, Osborn ZH. Personalized drinking feedback intervention for veterans of the wars in Iraq and Afghanistan: a randomized controlled trial. *J Stud Alcohol Drugs.* 2015;76(3):355-9.
75. Mason BJ, Goodman AM, Chabac S, Leher P. Effect of oral acamprosate on abstinence in patients with alcohol dependence in a double-blind, placebo controlled trial: the role of patient motivation. *J Psychiatr Res.* 2006;40(5):383-93.
76. McDonell MG, Srebnik D, Angelo F, et al. Randomized controlled trial of contingency management for stimulant use in community mental health patients with serious mental illness. *Am J Psychiatry.* 2013;170(1):94-101.
77. McDonell MG, Leickly E, McPherson S, et al. A Randomized Controlled Trial of Ethyl Glucuronide-Based Contingency Management for Outpatients With Co-Occurring Alcohol Use Disorders and Serious Mental Illness. *Am J Psychiatry.* 2017;174(4):370-377.
78. McGrath PJ, Nunes EV, Stewart JW, et al. Imipramine treatment of alcoholics with primary depression: A placebo-controlled clinical trial. *Arch Gen Psychiatry.* 1996;53(3):232-40.
79. McKay JR, Lynch KG, Shepard DS, et al. The effectiveness of telephone-based continuing care for alcohol and cocaine dependence: 24-month outcomes. *Arch Gen Psychiatry.* 2005;62(2):199-207.
80. Miguel AQ, Madruga CS, Cogo-Moreira H, et al. Contingency management is effective in promoting abstinence and retention in treatment among crack cocaine users in Brazil: A randomized controlled trial. *Psychol Addict Behav.* 2016;30(5):536-543
81. Miller WR, Gribskov CJ, Mortell RL. Effectiveness of a self-control manual for problem drinkers with and without therapist contact. *Int J Addict.* 1981;16(7):1247-54.
82. Mills KL, Teesson M, Back SE, et al. Integrated exposure-based therapy for co-occurring posttraumatic stress disorder and substance dependence: a randomized controlled trial. *JAMA.* 2012;308(7):690-9.
83. Moore GF, Williams A, Moore L, Murphy S. An exploratory cluster randomised trial of a university halls of residence based social norms marketing campaign to reduce alcohol consumption among 1st year students. *Subst Abuse Treat Prev Policy.* 2013;8:15.
84. Morley KC, Teesson M, Reid SC, et al. Naltrexone versus acamprosate in the treatment of alcohol dependence: A multi-centre, randomized, double-blind, placebo-controlled trial. *Addiction.* 2006;101(10):1451-62.

85. Morley KC, Baillie A, Leung S, et al. Baclofen for the Treatment of Alcohol Dependence and Possible Role of Comorbid Anxiety. *Alcohol Alcohol*. 2014;49(6):654-60.
86. Morris PL, Hopwood M, Whelan G, et al. Naltrexone for alcohol dependence: a randomized controlled trial. *Addiction*. 2001;96(11):1565-73.
87. Mueller TI, Stout RL, Rudden S, et al. A double-blind, placebo-controlled pilot study of carbamazepine for the treatment of alcohol dependence. *Alcohol Clin Exp Res*. 1997;21(1):86-92.
88. Müller CA, Geisel O, Pelz P, et al. High-dose baclofen for the treatment of alcohol dependence (BACLAD study): a randomized, placebo controlled trial. *Eur Neuropsychopharmacol*. 2015;25(8):1167-77.
89. Mundt JC, Moore HK, Bean P. An interactive voice response program to reduce drinking relapse: a feasibility study. *J Subst Abuse Treat*. 2006;30(1):21-9.
90. Nadkarni A, Weobong B, Weiss HA, et al. Counselling for Alcohol Problems (CAP), a lay counsellor-delivered brief psychological treatment for harmful drinking in men, in primary care in India: a randomised controlled trial. *Lancet*. 2017;389(10065):186-195.
91. Nadkarni A, Weiss HA, Weobong B, et al. Sustained effectiveness and cost-effectiveness of Counselling for Alcohol Problems, a brief psychological treatment for harmful drinking in men, delivered by lay counsellors in primary care: 12 month follow-up of a randomised controlled trial. *PLoS Med*. 2017;14(9):e1002386.
92. Namkoong K, Lee BO, Lee PG, et al. Acamprosate in Korean alcohol-dependent patients: a multi-centre, randomized, double-blind, placebo controlled study. *Alcohol Alcohol*. 2003;38(2):135-41.
93. Neto D, Lambaz R, Aguiar P, Chick J. Effectiveness of sequential combined treatment in comparison with treatment as usual in preventing relapse in alcohol dependence. *Alcohol Alcohol*. 2008;43(6):661-8.
94. Niederhofer H, Staffen W, Mair A. Comparison of cyanamide and placebo in the treatment of alcohol dependence of adolescents. *Alcohol Alcohol*. 2003;38(1):50-3.
95. O'Malley SS, Jaffe AJ, Chang G, et al. Naltrexone and coping skills therapy for alcohol dependence. A controlled study. *Arch Gen Psychiatry*. 1992;49(11):881-7.
96. O'Malley SS, Sinha R, Grilo CM, et al. Naltrexone and cognitive behavioral coping skills therapy for the treatment of alcohol drinking and eating disorder features in alcohol-dependent women: a randomized controlled trial. *Alcohol Clin Exp Res*. 2007;31(4):625-34.
97. O'Malley SS, Robin RW, Levenson AL, et al. Naltrexone alone and with sertraline for the treatment of alcohol dependence in Alaska natives and non natives residing in rural settings: a randomized controlled trial. *Alcohol Clin Exp Res*. 2008;32(7):1271-83.
98. Oslin D, Liberto JG, O'Brien J, et al. Naltrexone as an adjunctive treatment for older patients with alcohol dependence. *Am J Geriatr Psychiatry*. 1997;5(4):324-32.
99. Oslin DW. Treatment of late-life depression complicated by alcohol dependence. *Am J Geriatr Psychiatry*. 2005;13(6):491-500.
100. Paille FM, Guelfi JD, Perkins AC, et al. Double-blind randomized multicentre trial of acamprosate in maintaining abstinence from alcohol. *Alcohol Alcohol*. 1995;30(2):239-47.
101. Pelc I, Verbanck P, Le Bon O, et al. Efficacy and safety of acamprosate in the treatment of detoxified alcohol-dependent patients. A 90-day placebo-controlled dose-finding study. *Br J Psychiatry*. 1997;171:73-7.
102. Pelc I, Hanak C, Baert I, et al. Effect of community nurse follow-up when treating alcohol dependence with acamprosate. *Alcohol Alcohol*. 2005;40(4):302-7.
103. Petrakis IL, Poling J, Levinson C, et al. Naltrexone and disulfiram in patients with alcohol dependence and comorbid post-traumatic stress disorder. *Biol Psychiatry*. 2006;60(7):777-83.
104. Petry NM, Martin B, Cooney JL, Kranzler HR. Give them prizes, and they will come: contingency management for treatment of alcohol dependence. *J Consult Clin Psychol*. 2000;68(2):250-7.

105. Petry NM, Rash CJ, Easton CJ. Contingency management treatment in substance abusers with and without legal problems. *J Am Acad Psychiatry Law*. 2011;39(3):370-8.
106. Pettinati HM, Volpicelli JR, Luck G, et al. Double-blind clinical trial of sertraline treatment for alcohol dependence. *J Clin Psychopharmacol*. 2001;21(2):143-53.
107. Pettinati HM, Kampman KM, Lynch KG, et al. A double blind, placebo-controlled trial that combines disulfiram and naltrexone for treating co-occurring cocaine and alcohol dependence. *Addict Behav*. 2008;33(5):651-67.
108. Pettinati HM, Oslin DW, Kampman KM, et al. A double-blind, placebo-controlled trial combining sertraline and naltrexone for treating co-occurring depression and alcohol dependence. *Am J Psychiatry*. 2010;167(6):668-75.
109. Pettinati HM, Kampman KM, Lynch KG, et al. A pilot trial of injectable, extended-release naltrexone for the treatment of co-occurring cocaine and alcohol dependence. *Am J Addict*. 2014;23(6):591-7.
110. Poldrugo F. Acamprosate treatment in a long-term community-based alcohol rehabilitation programme. *Addiction*. 1997;92(11):1537-46.
111. Rash CJ, Alessi SM, Petry NM. Cocaine abusers with and without alcohol dependence respond equally well to contingency management treatments. *Exp Clin Psychopharmacol*. 2008;16(4):275-81.
112. Reback CJ, Peck JA, Dierst-Davies R, et al. Contingency management among homeless, out-of-treatment men who have sex with men. *J Subst Abuse Treat*. 2010;39(3):255-63.
113. Richter C, Effenberger S, Bschor T, et al. Efficacy and safety of levetiracetam for the prevention of alcohol relapse in recently detoxified alcohol dependent patients: a randomized trial. *J Clin Psychopharmacol*. 2012;32(4):558-62.
114. Roll JM, Petry NM, Stitzer ML, et al. Contingency management for the treatment of methamphetamine use disorders. *Am J Psychiatry*. 2006;163(11):1993-9.
115. Saitz R, Palfai TP, Cheng DM, et al. Brief intervention for medical inpatients with unhealthy alcohol use: a randomized, controlled trial. *Ann Intern Med*. 2007;146(3):167-76.
116. Saitz R, Cheng DM, Winter M, et al. Chronic care management for dependence on alcohol and other drugs: the AHEAD randomized trial. *JAMA*. 2013;310(11):1156-67.
117. Sass H, Soyka M, Mann K, Zieglgänsberger W. Relapse prevention by acamprosate. Results from a placebo-controlled study on alcohol dependence. *Arch Gen Psychiatry*. 1996;53(8):673-80.
118. Schumacher JE, Milby JB, Wallace D, et al. Diagnostic compared with abstinence outcomes of day treatment and contingency management among cocaine-dependent homeless persons. *Exp Clin Psychopharmacol*. 2003;11(2):146-57.
119. Signor L, Pierozan PS, Ferigolo M, et al. Efficacy of the telephone-based Brief Motivational Intervention for alcohol problems in Brazil. *Rev Bras Psiquiatr*. 2013;35(3):254-61.
120. Sinadinovic K, Wennberg P, Johansson M, Berman AH. Targeting individuals with problematic alcohol use via Web-based cognitive-behavioral self-help modules, personalized screening feedback or assessment only: a randomized controlled trial. *Eur Addict Res*. 2014;20(6):305-18.
121. Stein MD, Caviness CM, Anderson BJ, et al. A brief alcohol intervention for dangerously drinking incarcerated women. *Addiction*. 2010;105(3):466-75.
122. O'Malley SS, Rounsaville BJ, Farren C, et al. Initial and maintenance naltrexone treatment for alcohol dependence using primary care vs specialty care: a nested sequence of 3 randomized trials. *Arch Intern Med*. 2003;163(14):1695-704.
123. Tempesta E, Janiri L, Bignamini A, et al. Acamprosate and relapse prevention in the treatment of alcohol dependence: a placebo-controlled study. *Alcohol Alcohol*. 2000;35(2):202-9.



124. Tolliver BK, Desantis SM, Brown DG, et al. A randomized, double-blind, placebo-controlled clinical trial of acamprosate in alcohol-dependent individuals with bipolar disorder: a preliminary report. *Bipolar Disord.* 2012;14(1):54-63.
125. Toneatto T, Brands B, Selby P. A randomized, double-blind, placebo-controlled trial of naltrexone in the treatment of concurrent alcohol use disorder and pathological gambling. *Am J Addict.* 2009;18(3):219-25.
126. Upshur C, Weinreb L, Bharel M, et al. A randomized control trial of a chronic care intervention for homeless women with alcohol use problems. *J Subst Abuse Treat.* 2015;51:19-29.
127. Utter GH, Young JB, Theard LA, et al. The effect on problematic drinking behavior of a brief motivational interview shortly after a first arrest for driving under the influence of alcohol: a randomized trial. *J Trauma Acute Care Surg.* 2014;76(3):661-70; discussion 670-1.
128. Volpicelli JR, Alterman AI, Hayashida M, O'Brien CP. Naltrexone in the treatment of alcohol dependence. *Arch Gen Psychiatry.* 1992;49(11):876-80.
129. Volpicelli JR, Rhines KC, Rhines JS, et al. Naltrexone and alcohol dependence. Role of subject compliance. *Arch Gen Psychiatry.* 1997;54(8):737-42.
130. Werch CE, Pappas DM, Carlson JM, DiClemente CC. Short- and long-term effects of a pilot prevention program to reduce alcohol consumption. *Subst Use Misuse.* 1998;33(11):2303-21.
131. Whitworth AB, Fischer F, Lesch OM, et al. Comparison of acamprosate and placebo in long-term treatment of alcohol dependence. *Lancet.* 1996;347(9013):1438-42.
132. Wiesbeck GA, Weijers HG, Lesch OM, et al. Flupenthixol decanoate and relapse prevention in alcoholics: results from a placebo-controlled study. *Alcohol Alcohol.* 2001;36(4):329-34.
133. De Wildt WA, Schippers GM, et al. Does psychosocial treatment enhance the efficacy of acamprosate in patients with alcohol problems? *Alcohol Alcohol.* 2002;37(4):375-82.
134. Willenbring ML, Olson DH. A randomized trial of integrated outpatient treatment for medically ill alcoholic men. *Arch Intern Med.* 1999;159(16):1946-52.
135. Winters KC, Fahnhorst T, Botzet A, et al. Brief intervention for drug-abusing adolescents in a school setting: outcomes and mediating factors. *J Subst Abuse Treat.* 2012;42(3):279-88.
136. Winters KC, Lee S, Botzet A, et al. One-year outcomes and mediators of a brief intervention for drug abusing adolescents. *Psychol Addict Behav.* 2014;28(2):464-74.
137. Wölwer W, Frommann N, Jänner M, et al. The effects of combined acamprosate and integrative behaviour therapy in the outpatient treatment of alcohol dependence: a randomized controlled trial. *Drug Alcohol Depend.* 2011;118(2-3):417-22.

**Table S3.** Sensitivity Analysis: Pooled odds ratios and credible intervals of (\*) the main analysis represents our main results and were also presented in Figure 3 in the main text; (a) "USA only" indicates the pooled estimation of data extracted from all USA papers; (b) Data were extracted from treatment and follow-up sessions lasting more than 12 weeks; (c) Trials of reporting discontinuous abstinence were excluded, and all the continuous abstinence data was pooled-estimated in the network meta-analysis. All the results of (a), (b) and (c) were used for comparison with the main analysis (\*) to complete sensitivity analysis.

| Intervention                    | Treatment session             |                         |                           |                                     | Follow-up session  |                         |                           |                                     |
|---------------------------------|-------------------------------|-------------------------|---------------------------|-------------------------------------|--------------------|-------------------------|---------------------------|-------------------------------------|
|                                 | Main analysis(*)              | USA only <sup>(a)</sup> | ≥ 12 weeks <sup>(b)</sup> | Continuous abstinent <sup>(c)</sup> | Main analysis(*)   | USA only <sup>(a)</sup> | ≥ 12 weeks <sup>(b)</sup> | Continuous abstinent <sup>(c)</sup> |
|                                 | Compare to BI                 |                         |                           |                                     |                    |                         |                           |                                     |
| CM                              | 2.75 (0.31, 31.82)            | 1.23 (0.32, 4.53)       | 3.23 (0.38, 37.95)        | 2.70 (0.32, 31.34)                  | 1.47 (0.24, 10.96) | 1.85 (0.21, 17.65)      | 1.36 (0.21, 10.00)        | 1.53 (0.22, 11.54)                  |
| CM + Psychotherapy              | 4.06 (2.07, 8.18)             | 2.53 (1.45, 4.44)       | 3.70 (2.06, 6.51)         | 5.30 (2.88, 8.05)                   | 0.81 (0.42, 1.52)  | 0.87 (0.38, 1.87)       | 0.52 (0.19, 1.45)         | 0.94 (0.46, 1.89)                   |
| Control                         | 0.81 (0.59, 1.12)             | 0.81 (0.59, 1.09)       | 0.92 (0.67, 1.26)         | 0.78 (0.57, 1.07)                   | 0.76 (0.46, 1.22)  | 0.95 (0.42, 2.04)       | 0.72 (0.40, 1.25)         | 0.81 (0.44, 1.46)                   |
| Pharmacotherapy                 | 0.96 (0.64, 1.48)             | 1.08 (0.69, 1.70)       | 1.32 (0.87, 2.00)         | 0.92 (0.62, 1.36)                   | 0.52 (0.26, 1.02)  | 0.49 (0.13, 1.74)       | 0.53 (0.25, 1.12)         | 0.50 (0.22, 1.09)                   |
| Pharmacotherapy + BI            | 1.87 (1.40, 2.49)             | 1.54 (1.08, 2.20)       | 2.01 (1.54, 2.62)         | 2.08 (1.65, 2.66)                   | 0.53 (0.39, 0.74)  | 0.70 (0.33, 1.51)       | 0.50 (0.34, 0.74)         | 0.53 (0.38, 0.75)                   |
| Pharmacotherapy + Psychotherapy | 1.43 (0.96, 2.22)             | 1.26 (0.87, 1.85)       | 1.41 (0.98, 2.08)         | 1.42 (0.98, 2.11)                   | 0.48 (0.27, 0.84)  | 0.66 (0.27, 1.68)       | 0.51 (0.25, 1.06)         | 0.44 (0.21, 0.86)                   |
| Psychotherapy                   | 1.23 (0.87, 1.76)             | 1.10 (0.80, 1.52)       | 1.14 (0.81, 1.59)         | 1.35 (0.98, 1.87)                   | 0.75 (0.52, 1.06)  | 0.84 (0.53, 1.37)       | 0.80 (0.50, 1.29)         | 0.72 (0.49, 1.06)                   |
| Psychotherapy + BI              | 1.48 (0.79, 2.78)             | 1.72 (1.03, 2.95)       | 1.77 (0.89, 3.47)         | 1.08 (0.46, 2.52)                   | 1.65 (0.71, 3.92)  | 1.39 (0.32, 6.03)       | 1.51 (0.58, 4.22)         | 1.42 (0.42, 4.85)                   |
|                                 | Compare to CM                 |                         |                           |                                     |                    |                         |                           |                                     |
| CM + Psychotherapy              | 1.46 (0.12, 14.07)            | 2.05 (0.52, 8.66)       | 1.14 (0.10, 10.23)        | 2.70 (0.19, 27.80)                  | 0.55 (0.07, 3.74)  | 0.47 (0.05, 4.46)       | 0.39 (0.04, 3.21)         | 0.62 (0.07, 4.75)                   |
| Control                         | 0.30 (0.03, 2.59)             | 0.66 (0.18, 2.44)       | 0.29 (0.03, 2.32)         | 0.29 (0.03, 2.39)                   | 0.52 (0.07, 3.05)  | 0.51 (0.06, 4.03)       | 0.53 (0.08, 3.21)         | 0.53 (0.07, 3.34)                   |
| Pharmacotherapy                 | 0.35 (0.03, 3.13)             | 0.89 (0.24, 3.41)       | 0.41 (0.04, 3.44)         | 0.34 (0.03, 2.80)                   | 0.35 (0.05, 2.18)  | 0.26 (0.03, 2.58)       | 0.40 (0.05, 2.65)         | 0.32 (0.04, 2.28)                   |
| Pharmacotherapy + BI            | 0.68 (0.06, 5.98)             | 1.25 (0.33, 4.95)       | 0.62 (0.05, 5.24)         | 0.77 (0.07, 6.60)                   | 0.36 (0.05, 2.30)  | 0.38 (0.04, 3.78)       | 0.37 (0.05, 2.52)         | 0.35 (0.04, 2.53)                   |
| Pharmacotherapy + Psychotherapy | 0.51 (0.04, 4.78)             | 1.03 (0.28, 4.00)       | 0.44 (0.04, 3.76)         | 0.53 (0.04, 4.58)                   | 0.33 (0.04, 2.17)  | 0.36 (0.03, 3.71)       | 0.38 (0.04, 2.81)         | 0.28 (0.03, 2.21)                   |
| Psychotherapy                   | 0.44 (0.04, 3.99)             | 0.90 (0.24, 3.48)       | 0.35 (0.03, 2.95)         | 0.50 (0.04, 4.31)                   | 0.51 (0.07, 3.19)  | 0.46 (0.05, 4.09)       | 0.59 (0.08, 4.09)         | 0.47 (0.06, 3.30)                   |
| Psychotherapy + BI              | 0.54 (0.04, 5.09)             | 1.40 (0.35, 5.75)       | 0.55 (0.04, 5.03)         | 0.39 (0.03, 4.04)                   | 1.12 (0.14, 8.60)  | 0.76 (0.05, 10.65)      | 1.11 (0.12, 9.76)         | 0.91 (0.09, 9.28)                   |
|                                 | Compare to CM + Psychotherapy |                         |                           |                                     |                    |                         |                           |                                     |
| Control                         | 0.20 (0.10, 0.40)             | 0.32 (0.18, 0.57)       | 0.25 (0.13, 0.46)         | 0.11 (0.04, 0.28)                   | 0.93 (0.44, 2.05)  | 1.09 (0.38, 3.07)       | 1.38 (0.44, 4.35)         | 0.87 (0.35, 2.10)                   |
| Pharmacotherapy                 | 0.24 (0.11, 0.48)             | 0.43 (0.22, 0.82)       | 0.36 (0.19, 0.69)         | 0.13 (0.05, 0.33)                   | 0.63 (0.26, 1.63)  | 0.57 (0.13, 2.37)       | 1.02 (0.31, 3.64)         | 0.53 (0.19, 1.52)                   |
| Pharmacotherapy + BI            | 0.46 (0.22, 0.95)             | 0.61 (0.32, 1.17)       | 0.54 (0.30, 1.02)         | 0.29 (0.11, 0.74)                   | 0.65 (0.33, 1.35)  | 0.81 (0.28, 2.57)       | 0.96 (0.33, 2.77)         | 0.56 (0.26, 1.22)                   |

|                                 |                                            |                   |                   |                   |  |                   |                    |                    |                    |
|---------------------------------|--------------------------------------------|-------------------|-------------------|-------------------|--|-------------------|--------------------|--------------------|--------------------|
| Pharmacotherapy + Psychotherapy | 0.35 (0.18, 0.68)                          | 0.50 (0.29, 0.86) | 0.38 (0.22, 0.67) | 0.20 (0.08, 0.48) |  | 0.59 (0.28, 1.29) | 0.76 (0.27, 2.24)  | 0.97 (0.30, 3.19)  | 0.46 (0.18, 1.15)  |
| Psychotherapy                   | 0.30 (0.17, 0.54)                          | 0.44 (0.27, 0.70) | 0.31 (0.19, 0.50) | 0.19 (0.08, 0.44) |  | 0.93 (0.51, 1.68) | 0.97 (0.48, 2.00)  | 1.52 (0.58, 4.24)  | 0.76 (0.39, 1.53)  |
| Psychotherapy + BI              | 0.37 (0.14, 0.90)                          | 0.69 (0.33, 1.44) | 0.48 (0.20, 1.16) | 0.15 (0.04, 0.53) |  | 2.04 (0.71, 6.05) | 1.60 (0.30, 8.81)  | 2.87 (0.70, 13.32) | 1.52 (0.37, 6.09)  |
|                                 | Compare to Control                         |                   |                   |                   |  |                   |                    |                    |                    |
| Pharmacotherapy                 | 1.18 (0.88, 1.60)                          | 1.35 (0.91, 1.98) | 1.43 (1.05, 1.97) | 1.17 (0.87, 1.61) |  | 0.68 (0.40, 1.16) | 0.52 (0.18, 1.44)  | 0.74 (0.41, 1.36)  | 0.61 (0.32, 1.17)  |
| Pharmacotherapy + BI            | 2.30 (1.51, 3.51)                          | 1.91 (1.21, 3.03) | 2.18 (1.46, 3.27) | 2.66 (1.83, 3.93) |  | 0.70 (0.40, 1.26) | 0.74 (0.25, 2.30)  | 0.70 (0.38, 1.35)  | 0.65 (0.34, 1.27)  |
| Pharmacotherapy + Psychotherapy | 1.76 (1.17, 2.73)                          | 1.57 (1.04, 2.32) | 1.54 (1.03, 2.36) | 1.82 (1.21, 2.78) |  | 0.63 (0.32, 1.31) | 0.70 (0.23, 2.20)  | 0.70 (0.30, 1.72)  | 0.53 (0.22, 1.29)  |
| Psychotherapy                   | 1.51 (1.04, 2.21)                          | 1.36 (0.95, 1.95) | 1.23 (0.85, 1.83) | 1.72 (1.18, 2.55) |  | 0.99 (0.57, 1.70) | 0.89 (0.41, 1.99)  | 1.11 (0.58, 2.18)  | 0.88 (0.45, 1.71)  |
| Psychotherapy + BI              | 1.82 (0.90, 3.71)                          | 2.14 (1.24, 3.76) | 1.91 (0.95, 3.91) | 1.37 (0.56, 3.41) |  | 2.18 (0.84, 6.01) | 1.47 (0.28, 7.91)  | 2.09 (0.70, 6.97)  | 1.74 (0.45, 6.95)  |
|                                 | Compare to Pharmacotherapy                 |                   |                   |                   |  |                   |                    |                    |                    |
| Pharmacotherapy + BI            | 1.95 (1.18, 3.18)                          | 1.42 (0.80, 2.49) | 1.52 (0.94, 2.48) | 2.26 (1.47, 3.50) |  | 1.02 (0.50, 2.14) | 1.42 (0.34, 6.85)  | 0.94 (0.42, 2.10)  | 1.06 (0.47, 2.45)  |
| Pharmacotherapy + Psychotherapy | 1.49 (0.97, 2.34)                          | 1.16 (0.74, 1.87) | 1.08 (0.69, 1.69) | 1.54 (1.01, 2.41) |  | 0.93 (0.40, 2.21) | 1.35 (0.30, 6.47)  | 0.96 (0.35, 2.60)  | 0.87 (0.31, 2.39)  |
| Psychotherapy                   | 1.27 (0.84, 1.96)                          | 1.01 (0.65, 1.61) | 0.86 (0.55, 1.33) | 1.46 (0.98, 2.21) |  | 1.44 (0.70, 3.01) | 1.71 (0.48, 6.55)  | 1.49 (0.65, 3.49)  | 1.45 (0.61, 3.37)  |
| Psychotherapy + BI              | 1.54 (0.72, 3.28)                          | 1.59 (0.82, 3.06) | 1.34 (0.63, 2.85) | 1.17 (0.46, 2.94) |  | 3.20 (1.08, 9.55) | 2.85 (0.40, 21.44) | 2.81 (0.84, 10.05) | 2.88 (0.68, 12.59) |
|                                 | Compare to Pharmacotherapy + BI            |                   |                   |                   |  |                   |                    |                    |                    |
| Pharmacotherapy + Psychotherapy | 0.76 (0.47, 1.28)                          | 0.82 (0.49, 1.35) | 0.71 (0.46, 1.08) | 0.68 (0.45, 1.06) |  | 0.91 (0.50, 1.63) | 0.95 (0.29, 3.01)  | 1.01 (0.48, 2.14)  | 0.83 (0.38, 1.66)  |
| Psychotherapy                   | 0.66 (0.42, 1.03)                          | 0.71 (0.45, 1.13) | 0.57 (0.38, 0.84) | 0.65 (0.44, 0.96) |  | 1.41 (0.90, 2.20) | 1.21 (0.48, 2.92)  | 1.59 (0.92, 2.76)  | 1.36 (0.84, 2.18)  |
| Psychotherapy + BI              | 0.79 (0.40, 1.58)                          | 1.11 (0.61, 2.08) | 0.88 (0.43, 1.84) | 0.52 (0.21, 1.25) |  | 3.13 (1.26, 7.74) | 1.98 (0.38, 10.36) | 2.99 (1.06, 9.13)  | 2.67 (0.77, 9.60)  |
|                                 | Compare to Pharmacotherapy + Psychotherapy |                   |                   |                   |  |                   |                    |                    |                    |
| Psychotherapy                   | 0.86 (0.63, 1.14)                          | 0.87 (0.65, 1.15) | 0.80 (0.61, 1.04) | 0.95 (0.71, 1.25) |  | 1.56 (0.94, 2.56) | 1.27 (0.58, 2.81)  | 1.56 (0.85, 2.91)  | 1.65 (0.89, 3.22)  |
| Psychotherapy + BI              | 1.03 (0.48, 2.19)                          | 1.36 (0.74, 2.52) | 1.25 (0.58, 2.65) | 0.75 (0.30, 1.89) |  | 3.47 (1.26, 9.52) | 2.11 (0.36, 11.65) | 2.96 (0.87, 10.59) | 3.29 (0.83, 13.85) |
|                                 | Compare to Psychotherapy                   |                   |                   |                   |  |                   |                    |                    |                    |
| Psychotherapy + BI              | 1.20 (0.58, 2.46)                          | 1.57 (0.87, 2.82) | 1.55 (0.75, 3.25) | 0.79 (0.32, 2.00) |  | 2.22 (0.89, 5.63) | 1.67 (0.35, 7.70)  | 1.90 (0.65, 6.00)  | 1.98 (0.56, 7.14)  |

**Table S4.** Pairwise meta-analysis of different interventions versus controls regarding treatment sessions and follow-up sessions. The effects of overall and each intervention regarding treatment sessions and follow-up sessions were presented. [OR: odds ratio; CI: credible intervals].

|                   | Intervention                                | No. of reports | Data Synthesis       |           |         |
|-------------------|---------------------------------------------|----------------|----------------------|-----------|---------|
|                   |                                             |                | OR (95% CI)          | I-squared | P value |
| Treatment session | Overall                                     |                |                      |           |         |
|                   | Intervention vs. Control                    | 60             | 1.260 (1.091, 1.455) | 67.30%    | 0.002   |
|                   | Subgroup                                    |                |                      |           |         |
|                   | Pharmacotherapy + Psychotherapy vs. Control | 2              | 1.178 (1.002, 1.386) | 15.30%    | 0.048   |
|                   | Psychotherapy vs. Control                   | 5              | 1.052 (0.907, 1.220) | 22.70%    | 0.501   |
|                   | Pharmacotherapy vs. Control                 | 27             | 1.074 (1.002, 1.152) | 47.70%    | 0.045   |
|                   | CM vs. Control                              | 2              | 1.306 (1.048, 1.627) | 81.90%    | 0.017   |
|                   | BI vs. Control                              | 22             | 1.064 (1.003, 1.128) | 78.60%    | 0.038   |
|                   | Psychotherapy + BI vs. Control              | 2              | 1.500 (1.055, 2.133) | 29.00%    | 0.024   |
| Follow-up session | Overall                                     |                |                      |           |         |
|                   | Intervention vs. Control                    | 16             | 1.252 (1.012, 1.550) | 12.20%    | 0.039   |
|                   | Subgroup                                    |                |                      |           |         |
|                   | BI vs. Control                              | 5              | 1.062 (0.928, 1.216) | 43.50%    | 0.381   |
|                   | Pharmacotherapy + BI vs. Control            | 1              | —                    | —         | —       |
|                   | Pharmacotherapy vs. Control                 | 6              | 1.442 (1.094, 1.900) | 0.00%     | 0.009   |
|                   | Psychotherapy vs. Control                   | 3              | 0.967 (0.552, 1.693) | 0.00%     | 0.906   |
|                   | CM vs. Control                              | 1              | —                    | —         | —       |

**Table S5.** Pairwise meta-analysis of best rank intervention versus other interventions. Data of best rank intervention of treatment session (CM + psychotherapy) and follow-up session (pharmacotherapy + psychotherapy) were pooled-estimated. The effects of overall and each intervention were presented [OR: odds ratios; CI: credible intervals].

|                   | Intervention                                             | No. of reports | Data Synthesis       |           |         |
|-------------------|----------------------------------------------------------|----------------|----------------------|-----------|---------|
|                   |                                                          |                | OR (95% CI)          | I-squared | P value |
| Treatment session | Overall                                                  |                |                      |           |         |
|                   | CM + Psychotherapy vs. Other Interventions               | 11             | 2.191 (1.290, 3.720) | 70.70%    | 0.004   |
|                   | Subgroup                                                 |                |                      |           |         |
|                   | CM + Psychotherapy vs. BI                                | 1              | —                    | —         | —       |
|                   | CM + Psychotherapy vs. Psychotherapy                     | 10             | 2.277 (1.271, 4.081) | 73.60%    | 0.006   |
| Follow-up session | Overall                                                  |                |                      |           |         |
|                   | Pharmacotherapy + Psychotherapy vs. Other Interventions  | 9              | 1.409 (1.079, 1.840) | 0.00%     | 0.012   |
|                   | Subgroup                                                 |                |                      |           |         |
|                   | Pharmacotherapy + Psychotherapy vs. Pharmacotherapy      | 1              | —                    | —         | —       |
|                   | Pharmacotherapy + Psychotherapy vs. Pharmacotherapy + BI | 2              | 1.302 (0.830, 2.041) | 0.00%     | 0.251   |
|                   | Pharmacotherapy + Psychotherapy vs. Psychotherapy        | 6              | 1.410 (1.005, 1.978) | 0.00%     | 0.046   |

**Table S6.** A node-splitting model was used to test the direct and indirect effects. Potential inconsistency may exist if P-value < 0.05 and indicates results' lack of robustness.

| Treatment session                                   |                             |                             |                     |         | Follow-up session                                        |                     |                     |                     |         |
|-----------------------------------------------------|-----------------------------|-----------------------------|---------------------|---------|----------------------------------------------------------|---------------------|---------------------|---------------------|---------|
| Comparison                                          | Direct Effect               | Indirect Effect             | Overall             | P-Value | Comparison                                               | Direct Effect       | Indirect Effect     | Overall             | P-Value |
| BI vs. CM + Psychotherapy                           | 0.42 (-0.95, 1.78)          | 1.77 (1.02, 2.56)           | 1.39 (0.74, 2.08)   | 0.07    | BI vs. CM + Psychotherapy                                | 0.39 (-0.47, 1.27)  | 0.11 (-0.88, 1.12)  | 0.21 (-0.42, 0.86)  | 0.66    |
| BI vs. Control                                      | -0.36 (-0.72, 0.00)         | 0.27 (-0.36, 0.91)          | -0.20 (-0.52, 0.11) | 0.07    | BI vs. Control                                           | 0.03 (-0.52, 0.61)  | 0.77 (-0.06, 1.61)  | 0.27 (-0.20, 0.78)  | 0.15    |
| BI vs. Pharmacotherapy + BI                         | 0.64 (0.34, 0.93)           | 6.92E62 (-4.86E62, 7.86E62) | 0.63 (0.34, 0.91)   | 0.86    | BI vs. Pharmacotherapy                                   | 0.67 (-0.71, 2.11)  | 0.65 (-0.11, 1.44)  | 0.66 (-0.02, 1.34)  | 0.98    |
| BI vs. Pharmacotherapy + Psychotherapy              | 1.26 (-0.16, 2.64)          | 0.26 (-0.15, 0.70)          | 0.36 (-0.05, 0.79)  | 0.17    | BI vs. Pharmacotherapy + BI                              | 0.71 (0.37, 1.05)   | 0.20 (-0.77, 1.13)  | 0.63 (0.30, 0.95)   | 0.29    |
| BI vs. Psychotherapy                                | 0.39 (-0.03, 0.81)          | -0.12 (-0.67, 0.43)         | 0.20 (-0.14, 0.56)  | 0.13    | BI vs. Psychotherapy                                     | 0.30 (-0.13, 0.72)  | 0.31 (-0.33, 0.92)  | 0.29 (-0.06, 0.65)  | 0.99    |
| BI vs. Psychotherapy + BI                           | 0.38 (-0.23, 1.00)          | 1.79E62 (-2.55E62, 7.78E62) | 0.40 (-0.22, 1.01)  | 0.68    | Control vs. Pharmacotherapy + BI                         | -0.29 (-1.71, 1.08) | 0.46 (-0.16, 1.05)  | 0.36 (-0.23, 0.91)  | 0.31    |
| Control vs. Pharmacotherapy                         | 0.19 (-0.11, 0.49)          | -0.24 (-1.37, 0.03)         | 0.16 (-0.13, 0.47)  | 0.13    | Control vs. Psychotherapy                                | -0.64 (-1.63, 0.33) | 0.30 (-0.35, 0.92)  | 0.01 (-0.53, 0.56)  | 0.12    |
| Control vs. Pharmacotherapy + Psychotherapy         | 0.14 (-0.62, 0.93)          | 0.72 (0.26, 1.22)           | 0.56 (0.15, 1.00)   | 0.21    | Pharmacotherapy vs. Pharmacotherapy + BI                 | -0.53 (-1.94, 0.88) | 0.10 (-0.68, 0.85)  | -0.02 (-0.76, 0.69) | 0.41    |
| Control vs. Psychotherapy                           | -0.10 (-0.76, 0.56)         | 0.60 (0.16, 1.04)           | 0.40 (0.04, 0.78)   | 0.08    | Pharmacotherapy + BI vs. Pharmacotherapy + Psychotherapy | 0.29 (-0.58, 1.14)  | -0.01 (-0.81, 0.77) | 0.10 (-0.49, 0.69)  | 0.61    |
| Control vs. Psychotherapy + BI                      | 1.13E62 (-3.33E62, 1.31E62) | 0.59 (-0.10, 1.31)          | 0.60 (-0.09, 1.28)  | 0.62    | Pharmacotherapy + BI vs. Psychotherapy                   | -0.02 (-1.15, 1.12) | -0.40 (-0.87, 0.08) | -0.34 (-0.79, 0.11) | 0.52    |
| Pharmacotherapy vs. Pharmacotherapy + BI            | -4.48E62 (-1.09E62, 8.7E62) | 0.67 (0.18, 1.16)           | 0.66 (0.16, 1.15)   | 0.61    | Pharmacotherapy + Psychotherapy vs. Psychotherapy        | -0.33 (-0.87, 0.23) | -0.80 (-1.80, 0.17) | -0.45 (-0.94, 0.06) | 0.37    |
| Pharmacotherapy vs. Pharmacotherapy + Psychotherapy | 0.41 (-0.21, 1.07)          | 0.30 (-0.28, 0.89)          | 0.39 (-0.04, 0.85)  | 0.80    |                                                          |                     |                     |                     |         |

|                                                          |                                |                     |                     |      |  |
|----------------------------------------------------------|--------------------------------|---------------------|---------------------|------|--|
| Pharmacotherapy vs. Psychotherapy                        | -0.18 (-0.96, 0.61)            | 0.31 (-0.16, 0.77)  | 0.24 (-0.19, 0.67)  | 0.29 |  |
| Pharmacotherapy + BI vs. Pharmacotherapy + Psychotherapy | 0.66 (-0.65, 2.05)             | -0.39 (-0.89, 0.13) | -0.27 (-0.76, 0.25) | 0.14 |  |
| Pharmacotherapy + BI vs. Psychotherapy                   | -0.42 (-1.97, 1.04)            | -0.43 (-0.87, 0.03) | -0.42 (-0.86, 0.03) | 0.99 |  |
| Pharmacotherapy + BI vs. Psychotherapy + BI              | 3.56E62<br>(-1.64E62, 6.73E62) | -0.24 (-0.91, 0.46) | -0.23 (-0.90, 0.45) | 0.33 |  |
| Pharmacotherapy + Psychotherapy vs. Psychotherapy        | -0.10 (-0.40, 0.20)            | -0.28 (-1.04, 0.46) | -0.16 (-0.46, 0.14) | 0.65 |  |
| Pharmacotherapy + Psychotherapy vs. Psychotherapy + BI   | 5.55E62<br>(-6.13E62, 1.22E62) | 0.01 (-0.74, 0.77)  | 0.04 (-0.72, 0.75)  | 0.99 |  |



**Table S7.** Overall GRADE quality of evidence. The quality was rated by direct comparison and indirect estimation. Higher ratings were assigned to network meta-analysis estimates if the ratings were coherent between direct and indirect comparisons.

| Outcomes       | Comparison           |                                 | Quality of the evidence<br>(Treatment Session) | Quality of the evidence<br>(Follow-up Session) |
|----------------|----------------------|---------------------------------|------------------------------------------------|------------------------------------------------|
| Abstinent Rate | BI                   | CM                              | ⊕                                              | ⊕                                              |
|                |                      | CM + Psychotherapy              | ⊕                                              | ⊕                                              |
|                |                      | Control                         | ⊕ ⊕ ⊕ ⊕                                        | ⊕ ⊕ ⊕ ⊕                                        |
|                |                      | Pharmacotherapy                 | ⊕ ⊕                                            | ⊕ ⊕                                            |
|                |                      | Pharmacotherapy + BI            | ⊕ ⊕ ⊕ ⊕                                        | ⊕ ⊕ ⊕                                          |
|                |                      | Pharmacotherapy + Psychotherapy | ⊕ ⊕ ⊕                                          | ⊕ ⊕                                            |
|                |                      | Psychotherapy                   | ⊕ ⊕ ⊕                                          | ⊕ ⊕ ⊕                                          |
|                |                      | Psychotherapy + BI              | ⊕ ⊕                                            | ⊕ ⊕                                            |
|                | CM                   | CM + Psychotherapy              | ⊕                                              | ⊕                                              |
|                |                      | Control                         | ⊕                                              | ⊕                                              |
|                |                      | Pharmacotherapy                 | ⊕ ⊕                                            | ⊕ ⊕                                            |
|                |                      | Pharmacotherapy + BI            | ⊕ ⊕                                            | ⊕                                              |
|                |                      | Pharmacotherapy + Psychotherapy | ⊕ ⊕                                            | ⊕ ⊕                                            |
|                |                      | Psychotherapy                   | ⊕ ⊕                                            | ⊕ ⊕                                            |
|                |                      | Psychotherapy + BI              | ⊕ ⊕                                            | ⊕ ⊕                                            |
|                | CM + Psychotherapy   | Control                         | ⊕ ⊕                                            | ⊕                                              |
|                |                      | Pharmacotherapy                 | ⊕                                              | ⊕                                              |
|                |                      | Pharmacotherapy + BI            | ⊕ ⊕                                            | ⊕                                              |
|                |                      | Pharmacotherapy + Psychotherapy | ⊕ ⊕ ⊕                                          | ⊕ ⊕                                            |
|                |                      | Psychotherapy                   | ⊕ ⊕ ⊕                                          | ⊕ ⊕ ⊕                                          |
|                |                      | Psychotherapy + BI              | ⊕ ⊕ ⊕                                          | ⊕ ⊕                                            |
| Control        | Pharmacotherapy      | ⊕ ⊕ ⊕ ⊕                         | ⊕ ⊕ ⊕                                          |                                                |
|                | Pharmacotherapy + BI | ⊕ ⊕ ⊕                           | ⊕                                              |                                                |

|  |                                 |                                 |         |       |
|--|---------------------------------|---------------------------------|---------|-------|
|  |                                 | Pharmacotherapy + Psychotherapy | ⊕ ⊕ ⊕   | ⊕ ⊕ ⊕ |
|  |                                 | Psychotherapy                   | ⊕ ⊕     | ⊕     |
|  |                                 | Psychotherapy + BI              | ⊕ ⊕ ⊕   | ⊕ ⊕   |
|  | Pharmacotherapy                 | Pharmacotherapy + BI            | ⊕ ⊕ ⊕   | ⊕ ⊕   |
|  |                                 | Pharmacotherapy + Psychotherapy | ⊕ ⊕ ⊕   | ⊕ ⊕   |
|  |                                 | Psychotherapy                   | ⊕       | ⊕ ⊕   |
|  |                                 | Psychotherapy + BI              | ⊕ ⊕ ⊕   | ⊕ ⊕   |
|  | Pharmacotherapy + BI            | Pharmacotherapy + Psychotherapy | ⊕ ⊕ ⊕   | ⊕ ⊕   |
|  |                                 | Psychotherapy                   | ⊕ ⊕ ⊕   | ⊕ ⊕   |
|  |                                 | Psychotherapy + BI              | ⊕ ⊕ ⊕   | ⊕ ⊕   |
|  | Pharmacotherapy + Psychotherapy | Psychotherapy                   | ⊕ ⊕ ⊕ ⊕ | ⊕ ⊕ ⊕ |
|  |                                 | Psychotherapy + BI              | ⊕ ⊕ ⊕   | ⊕ ⊕   |
|  | Psychotherapy                   | Psychotherapy + BI              | ⊕       | ⊕     |

GRADE Working Group grades of evidence

High quality (⊕ ⊕ ⊕ ⊕): Further research is very unlikely to change our confidence in the estimate of effect.

Moderate quality (⊕ ⊕ ⊕): Further research is likely to have an important impact on our confidence in the estimate of effect and may change the estimate.

Low quality (⊕ ⊕): Further research is very likely to have an important impact on our confidence in the estimate of effect and is likely to change the estimate.

Very low quality (⊕): We are very uncertain about the estimate.
